# Supplementary material for: Modelling interfacial ionic transport in Li2VO2F cathodes during battery operation
Source: Royal Society of Chemistry journal article supplement (doi:10.1039/d4ya00163j), 2024-01-01
Supplement: d4ya00163j1.pdf [file d4ya00163j1.pdf]

# Supporting data for: Modelling interfacial ionic transport in $\text{Li}_2\text{VO}_2\text{F}$ cathodes during battery operation

Jolla Kullgren<sup>a\*</sup>, Jin Hyun Chang<sup>b</sup>, Simon Loftager<sup>b</sup>, Shweta Dhillon<sup>a</sup>, Tejs Vegge<sup>b</sup> and Daniel Brandell<sup>a</sup>

<sup>a</sup> Department of Chemistry – Ångström Laboratory, Uppsala University, Box 538, SE-751 21, Uppsala, Sweden

<sup>b</sup> Department of Energy Conversion and Storage, Technical University of Denmark, DK-2800 Kgs. Lyngby, Denmark

\*E-mail: jolla.kullgren@kemi.uu.se

The fortran code used in the kinetic Monte-Carlo simulations can be found here:

[https://github.com/jollactic/MC\\_Hopper](https://github.com/jollactic/MC_Hopper)

A List of optimised DFT structures in POSCAR-format are provided below:

```
Li2V02F_BULK
1.0000000000000000
  8.8753919874421268   -0.0125971117202002   -0.0089344167860407
  5.9735692410598942   10.2648587893524734    0.0003625160092420
  5.9735692410598924    3.3944068954591877    9.6873798276326326
  V      Li      O      F
  16     32     32     16
Direct
0.0785580956272842   0.0621661316681020   0.0621661316681020
0.0785467059393940   0.0621639909389509   0.3121743931036770
0.0785349111011207   0.0621735275170968   0.5621756483164009
0.0785476578706097   0.0621730853833670   0.8121649966160408
0.0785467059393940   0.3121743931036770   0.0621639909389509
0.0785575064714669   0.3121670472959662   0.3121670472959662
0.0785456616412455   0.3121647237500960   0.5621753435545583
0.0785354183342581   0.3121750050731728   0.8121744846094598
0.0785349111011207   0.5621756483164009   0.0621735275170968
0.0785456616412455   0.5621753435545583   0.3121647237500960
0.0785555867496897   0.5621680424673628   0.5621680424673628
0.0785457974275550   0.5621655547639769   0.8121733834617016
0.0785476578706097   0.8121649966160408   0.0621730853833670
0.0785354183342581   0.8121744846094598   0.3121750050731728
0.0785457974275550   0.8121733834617016   0.5621655547639769
0.0785551172139346   0.8121668376770653   0.8121668376770653
```

|                    |                    |                    |
|--------------------|--------------------|--------------------|
| 0.4189648103072292 | 0.0604058713733996 | 0.0604058713733996 |
| 0.7381144862266361 | 0.0639394553331634 | 0.0639394553331634 |
| 0.4190475529234335 | 0.0603775237314666 | 0.3103736252442775 |
| 0.7380673848145690 | 0.0639599777566460 | 0.3139613884368704 |
| 0.4191414267960272 | 0.0603363014793725 | 0.5603367019108142 |
| 0.7379879049954249 | 0.0639880543004832 | 0.5639894207368655 |
| 0.4190506915080650 | 0.0603713310991249 | 0.8103766790504463 |
| 0.7380706337633016 | 0.0639612329503026 | 0.8139581752353583 |
| 0.4190475529234335 | 0.3103736252442775 | 0.0603775237314666 |
| 0.7380673848145690 | 0.3139613884368704 | 0.0639599777566460 |
| 0.4189691591852395 | 0.3104050312025722 | 0.3104050312025722 |
| 0.7381205788413071 | 0.3139399258288413 | 0.3139399258288413 |
| 0.4190441821539870 | 0.3103777553587976 | 0.5603736259933612 |
| 0.7380634041228752 | 0.3139600591200432 | 0.5639623840993632 |
| 0.4191421256007593 | 0.3103348065944508 | 0.8103355868727109 |
| 0.7379864820819358 | 0.3139901041148922 | 0.8139892892097682 |
| 0.4191414267960272 | 0.5603367019108142 | 0.0603363014793725 |
| 0.7379879049954249 | 0.5639894207368655 | 0.0639880543004832 |
| 0.4190441821539870 | 0.5603736259933612 | 0.3103777553587976 |
| 0.7380634041228752 | 0.5639623840993632 | 0.3139600591200432 |
| 0.4189700851730433 | 0.5604056874202309 | 0.5604056874202309 |
| 0.7381240217030480 | 0.5639381897283839 | 0.5639381897283839 |
| 0.4190462028250849 | 0.5603766208215019 | 0.8103732406467526 |
| 0.7380648478367614 | 0.5639605923863863 | 0.8139619299531831 |
| 0.4190506915080650 | 0.8103766790504463 | 0.0603713310991249 |
| 0.7380706337633016 | 0.8139581752353583 | 0.0639612329503026 |
| 0.4191421256007593 | 0.8103355868727109 | 0.3103348065944508 |
| 0.7379864820819358 | 0.8139892892097682 | 0.3139901041148922 |
| 0.4190462028250849 | 0.8103732406467526 | 0.5603766208215019 |
| 0.7380648478367614 | 0.8139619299531831 | 0.5639605923863863 |
| 0.4189646427506515 | 0.8104066110359235 | 0.8104066110359235 |
| 0.7381197958916699 | 0.8139385310901948 | 0.8139385310901948 |
| 0.9210945440146037 | 0.1848594201274139 | 0.1848594201274139 |
| 0.2360423537969503 | 0.1894725844174942 | 0.1894725844174942 |
| 0.9210412252287450 | 0.1848647598853647 | 0.4348834615647301 |
| 0.2360586399071886 | 0.1894477617039317 | 0.4394807330288876 |
| 0.9209913700580589 | 0.1848884757867894 | 0.6848881111409355 |
| 0.2360768560952873 | 0.1894575970366881 | 0.6894578596706749 |
| 0.9210412159328834 | 0.1848820363772733 | 0.9348650518917112 |
| 0.2360552727658781 | 0.1894803288967062 | 0.9394492809100901 |
| 0.9210412252287450 | 0.4348834615647301 | 0.1848647598853647 |
| 0.2360586399071886 | 0.4394807330288876 | 0.1894477617039317 |
| 0.9210924650064207 | 0.4348589681021345 | 0.4348589681021345 |
| 0.2360394868938037 | 0.4394722193607745 | 0.4394722193607745 |
| 0.9210414541243471 | 0.4348641353158140 | 0.6848839035669066 |
| 0.2360561940538301 | 0.4394493252985745 | 0.6894808069270070 |
| 0.9209915774917052 | 0.4348865454631207 | 0.9348877815512709 |
| 0.2360760081484036 | 0.4394569092676445 | 0.9394571798182734 |
| 0.9209913700580589 | 0.6848881111409355 | 0.1848884757867894 |
| 0.2360768560952873 | 0.6894578596706749 | 0.1894575970366881 |
| 0.9210414541243471 | 0.6848839035669066 | 0.4348641353158140 |

|                    |                    |                    |
|--------------------|--------------------|--------------------|
| 0.2360561940538301 | 0.6894808069270070 | 0.4394493252985745 |
| 0.9210918515442063 | 0.6848601537216946 | 0.6848601537216946 |
| 0.2360410463532627 | 0.6894718564371835 | 0.6894718564371835 |
| 0.9210405708051217 | 0.6848633675494141 | 0.9348838269939542 |
| 0.2360533799497207 | 0.6894490824611107 | 0.9394817782001168 |
| 0.9210412159328834 | 0.9348650518917112 | 0.1848820363772733 |
| 0.2360552727658781 | 0.9394492809100901 | 0.1894803288967062 |
| 0.9209915774917052 | 0.9348877815512709 | 0.4348865454631207 |
| 0.2360760081484036 | 0.9394571798182734 | 0.4394569092676445 |
| 0.9210405708051217 | 0.9348838269939542 | 0.6848633675494141 |
| 0.2360533799497207 | 0.9394817782001168 | 0.6894490824611107 |
| 0.9210936480945704 | 0.9348598790790694 | 0.9348598790790694 |
| 0.2360459837991668 | 0.9394705395224513 | 0.9394705395224513 |
| 0.5785708542573951 | 0.1871661084579769 | 0.1871661084579769 |
| 0.5785646346964030 | 0.1871879173508679 | 0.4371428271115104 |
| 0.5785558804378498 | 0.1871660807099125 | 0.6871677650299768 |
| 0.5785621329233654 | 0.1871425333405082 | 0.9371884375748276 |
| 0.5785646346964030 | 0.4371428271115104 | 0.1871879173508679 |
| 0.5785631451440232 | 0.4371676844867777 | 0.4371676844867777 |
| 0.5785636491567556 | 0.4371878779860118 | 0.6871433275771326 |
| 0.5785558318598980 | 0.4371677843169348 | 0.9371645393908747 |
| 0.5785558804378498 | 0.6871677650299768 | 0.1871660807099125 |
| 0.5785636491567556 | 0.6871433275771326 | 0.4371878779860118 |
| 0.5785637755471448 | 0.6871678891608758 | 0.6871678891608758 |
| 0.5785629274610972 | 0.6871864626995308 | 0.9371435191330055 |
| 0.5785621329233654 | 0.9371884375748276 | 0.1871425333405082 |
| 0.5785558318598980 | 0.9371645393908747 | 0.4371677843169348 |
| 0.5785629274610972 | 0.9371435191330055 | 0.6871864626995308 |
| 0.5785713337413680 | 0.9371656182852465 | 0.9371656182852465 |

LiF\_BULK

|                     |                     |                    |
|---------------------|---------------------|--------------------|
| 1.0000000000000000  |                     |                    |
| 4.0573833270957111  | -0.0000000000000000 | 0.0000000000000000 |
| -0.0000000000000000 | 4.0573833270957111  | 0.0000000000000000 |
| -0.0000000000000000 | 0.0000000000000000  | 4.0573833270957111 |

Li F  
4 4

Direct

|                    |                     |                     |
|--------------------|---------------------|---------------------|
| 0.0000000000000000 | -0.0000000000000000 | 0.0000000000000000  |
| 0.0000000000000000 | 0.5000000000000000  | 0.5000000000000000  |
| 0.5000000000000000 | -0.0000000000000000 | 0.5000000000000000  |
| 0.5000000000000000 | 0.5000000000000000  | 0.0000000000000000  |
| 0.5000000000000000 | 0.5000000000000000  | 0.5000000000000000  |
| 0.5000000000000000 | -0.0000000000000000 | -0.0000000000000000 |
| 0.0000000000000000 | 0.5000000000000000  | 0.0000000000000000  |
| 0.0000000000000000 | 0.0000000000000000  | 0.5000000000000000  |

LiF\_100\_SURFACE

|                    |                    |                    |
|--------------------|--------------------|--------------------|
| 1.0000000000000000 |                    |                    |
| 4.0573829999999997 | 0.0000000000000000 | 0.0000000000000000 |
| 0.0000000000000000 | 4.0573829999999997 | 0.0000000000000000 |

0.0000000000000000 0.0000000000000000 35.0000000000000000

Li F

24 24

Direct

|                     |                     |                     |
|---------------------|---------------------|---------------------|
| 0.0000000000000000  | 0.0000000000000000  | 0.7682361706644423  |
| 0.0000000000000000  | 0.0000000000000000  | 0.8842248181204013  |
| 0.0000000000000000  | 0.0000000000000000  | 0.4197004282485300  |
| 0.0000000000000000  | 0.0000000000000000  | 0.5361785877428379  |
| 0.0000000000000000  | 0.0000000000000000  | 0.6521937366846079  |
| 0.0000000000000000  | 0.0000000000000000  | -0.0007516541425205 |
| 0.0000000000000000  | 0.4999998767678591  | 0.8262325836857310  |
| 0.0000000000000000  | 0.4999998767678591  | 0.3631628255710889  |
| 0.0000000000000000  | 0.4999998767678591  | 0.9427107431800394  |
| 0.0000000000000000  | 0.4999998767678591  | 0.4781863247367472  |
| 0.0000000000000000  | 0.4999998767678591  | 0.5941750007641338  |
| 0.0000000000000000  | 0.4999998767678591  | 0.7102174347439610  |
| 0.5000001232321409  | -0.0000000000000000 | 0.8262325836857310  |
| 0.5000001232321409  | 0.0000000000000000  | 0.3631628255710889  |
| 0.5000001232321409  | -0.0000000000000000 | 0.9427107431800394  |
| 0.5000001232321409  | 0.0000000000000000  | 0.4781863247367472  |
| 0.5000001232321409  | 0.0000000000000000  | 0.5941750007641338  |
| 0.5000001232321409  | -0.0000000000000000 | 0.7102174347439610  |
| 0.5000001232321409  | 0.4999998767678591  | 0.7682361706644423  |
| 0.5000001232321409  | 0.4999998767678591  | 0.8842248181204013  |
| 0.5000001232321409  | 0.4999998767678591  | 0.4197004282485300  |
| 0.5000001232321409  | 0.4999998767678591  | 0.5361785877428379  |
| 0.5000001232321409  | 0.4999998767678591  | 0.6521937366846079  |
| 0.5000001232321409  | 0.4999998767678591  | -0.0007516541425205 |
| 0.0000000000000000  | -0.0000000000000000 | 0.8262465426300881  |
| -0.0000000000000000 | -0.0000000000000000 | 0.3612255449924354  |
| -0.0000000000000000 | -0.0000000000000000 | 0.9423474029623579  |
| -0.0000000000000000 | -0.0000000000000000 | 0.4781431081986664  |
| -0.0000000000000000 | 0.0000000000000000  | 0.5941806340689756  |
| -0.0000000000000000 | -0.0000000000000000 | 0.7102352622626177  |
| 0.0000000000000000  | 0.4999998767678591  | 0.7682305373596005  |
| -0.0000000000000000 | 0.4999998767678591  | 0.8842680346584832  |
| 0.0000000000000000  | 0.4999998767678591  | 0.4200637684662109  |
| -0.0000000000000000 | 0.4999998767678591  | 0.5361646287984808  |
| 0.0000000000000000  | 0.4999998767678591  | 0.6521759091659513  |
| 0.0000000000000000  | 0.4999998767678591  | 0.0011856264361339  |
| 0.5000001232321409  | -0.0000000000000000 | 0.7682305373596005  |
| 0.5000001232321409  | 0.0000000000000000  | 0.8842680346584832  |
| 0.5000001232321409  | -0.0000000000000000 | 0.4200637684662109  |
| 0.5000001232321409  | 0.0000000000000000  | 0.5361646287984808  |
| 0.5000001232321409  | -0.0000000000000000 | 0.6521759091659513  |
| 0.5000001232321409  | -0.0000000000000000 | 0.0011856264361339  |
| 0.5000001232321409  | 0.4999998767678591  | 0.8262465426300881  |
| 0.5000001232321409  | 0.4999998767678591  | 0.3612255449924354  |
| 0.5000001232321409  | 0.4999998767678591  | 0.9423474029623579  |
| 0.5000001232321409  | 0.4999998767678591  | 0.4781431081986664  |
| 0.5000001232321409  | 0.4999998767678591  | 0.5941806340689756  |

0.5000001232321409 0.4999998767678591 0.7102352622626177

LiF\_110\_SURFACE

1.0000000000000000

4.0573829999999997 0.0000000000000000 0.0000000000000000  
0.0000000000000000 5.7380069999999996 0.0000000000000000  
0.0000000000000000 0.0000000000000000 35.0000000000000000

Li F  
24 24

Direct

-0.0000000000000000 0.0000000000000000 0.7539658695759227  
0.0000000000000000 0.0000000000000000 0.8360402494051985  
0.0000000000000000 0.0000000000000000 0.9172863988498324  
0.0000000000000000 0.0000000000000000 0.5864787195848863  
-0.0000000000000000 0.0000000000000000 0.6712984663294859  
0.0000000000000000 0.0000000000000000 -0.0043134653517935  
-0.0000000000000000 0.5000000871382682 0.7539658695759227  
0.0000000000000000 0.5000000871382682 0.8360402494051985  
0.0000000000000000 0.5000000871382682 0.9172863988498324  
0.0000000000000000 0.5000000871382682 0.5864787195848863  
-0.0000000000000000 0.5000000871382682 0.6712984663294859  
0.0000000000000000 0.5000000871382682 -0.0043134653517935  
0.5000001232321409 0.2500000435691376 0.7951907589955086  
0.5000001232321409 0.2500000435691376 0.8778581622419455  
0.5000001232321409 0.2500000435691376 0.5534700939232243  
0.5000001232321409 0.2500000435691376 0.9626778804151100  
0.5000001232321409 0.2500000435691376 0.6318702297215989  
0.5000001232321409 0.2500000435691376 0.7131163505947978  
0.5000001232321409 0.7499999564308624 0.7951907589955086  
0.5000001232321409 0.7499999564308624 0.8778581622419455  
0.5000001232321409 0.7499999564308624 0.5534700939232243  
0.5000001232321409 0.7499999564308624 0.9626778804151100  
0.5000001232321409 0.7499999564308624 0.6318702297215989  
0.5000001232321409 0.7499999564308624 0.7131163505947978  
0.0000000000000000 0.2500000435691376 0.7951869929756007  
0.0000000000000000 0.2500000435691376 0.8774867084576480  
-0.0000000000000000 0.2500000435691376 0.5495487381283426  
-0.0000000000000000 0.2500000435691376 0.9604877308430558  
0.0000000000000000 0.2500000435691376 0.6309728347289643  
-0.0000000000000000 0.2500000435691376 0.7129826000781684  
0.0000000000000000 0.7499999564308624 0.7951869929756007  
0.0000000000000000 0.7499999564308624 0.8774867084576480  
-0.0000000000000000 0.7499999564308624 0.5495487381283426  
-0.0000000000000000 0.7499999564308624 0.9604877308430558  
0.0000000000000000 0.7499999564308624 0.6309728347289643  
-0.0000000000000000 0.7499999564308624 0.7129826000781684  
0.5000001232321409 0.0000000000000000 0.7539696355958306  
0.5000001232321409 0.0000000000000000 0.8361739999218279  
0.5000001232321409 0.0000000000000000 0.9181837938424671  
0.5000001232321409 0.0000000000000000 0.5886688691569405  
0.5000001232321409 0.0000000000000000 0.6716699201137833

|                    |                    |                     |
|--------------------|--------------------|---------------------|
| 0.5000001232321409 | 0.0000000000000000 | -0.0003921095569116 |
| 0.5000001232321409 | 0.5000000871382682 | 0.7539696355958306  |
| 0.5000001232321409 | 0.5000000871382682 | 0.8361739999218279  |
| 0.5000001232321409 | 0.5000000871382682 | 0.9181837938424671  |
| 0.5000001232321409 | 0.5000000871382682 | 0.5886688691569405  |
| 0.5000001232321409 | 0.5000000871382682 | 0.6716699201137833  |
| 0.5000001232321409 | 0.5000000871382682 | -0.0003921095569116 |

LiF\_111\_SURFACE

1.0000000000000000

5.7380069999999996 0.0000000000000000 0.0000000000000000

2.8690030000000002 4.9692590000000001 0.0000000000000000

0.0000000000000000 0.0000000000000000 35.0000000000000000

Li F  
28 28

Direct

|                    |                     |                    |
|--------------------|---------------------|--------------------|
| 1.0005263564594800 | 0.0005265307360168  | 0.7996672513545068 |
| 0.9997649347023175 | -0.0002348910211463 | 0.5972309768782608 |
| 0.6623970450876734 | 0.1623969968637563  | 0.8662864737583906 |
| 0.6683417238618468 | 0.1683416756379305  | 0.6652257246808396 |
| 0.5005264067687843 | 0.5005264301173963  | 0.7996672513545068 |
| 0.4997649850116214 | 0.4997650083602334  | 0.5972309768782608 |
| 0.4983247361927593 | -0.0016751766689727 | 0.7993385610334421 |
| 0.5042694149669336 | 0.0042695021052014  | 0.5982778119558911 |
| 0.3333333423202234 | 0.3333331991751720  | 0.7322821428571444 |
| 0.3542652686530106 | 0.3542651255079592  | 0.9407673896775204 |
| 0.3124014159874361 | 0.3124012728423848  | 0.5237968960367685 |
| 0.1623971690549136 | 0.6623970974823842  | 0.8662864737583906 |
| 0.1683418478290878 | 0.6683417762565576  | 0.6652257246808396 |
| 0.1669015253522898 | 0.1669013899901044  | 0.8673333088360210 |
| 0.1661401035951267 | 0.1661399682329412  | 0.6648970343597750 |
| 0.9983247865020637 | 0.4983247227124065  | 0.7993385610334421 |
| 1.0042694652762392 | 0.5042694014865807  | 0.5982778119558911 |
| 0.8333332920109200 | 0.8333332997937930  | 0.7322821428571444 |
| 0.8542652183437084 | 0.8542652261265814  | 0.9407673896775204 |
| 0.8124013656781316 | 0.8124013734610046  | 0.5237968960367685 |
| 0.8333332551819552 | 0.3333331991751720  | 0.7322821428571444 |
| 0.8169088302158586 | 0.3169087742090738  | 0.9281044478120890 |
| 0.8497576801480520 | 0.3497576241412702  | 0.5364598379021999 |
| 0.6669014750429861 | 0.6669014906087322  | 0.8673333088360210 |
| 0.6661400532858227 | 0.6661400688515687  | 0.6648970343597750 |
| 0.3333333791491881 | 0.8333332997937930  | 0.7322821428571444 |
| 0.3169089541830900 | 0.8169088748276964  | 0.9281044478120890 |
| 0.3497578041152863 | 0.8497577247598896  | 0.5364598379021999 |
| 0.9985985529926331 | -0.0014012727308310 | 0.8970695775410269 |
| 0.9998394781451055 | -0.0001603475783593 | 0.6989843979439646 |
| 0.6660128669169345 | 0.1660131205488727  | 0.7662369531445955 |
| 0.6776456522333071 | 0.1776459058652456  | 0.5603154891152378 |
| 0.6836255876362956 | 0.1836258412682347  | 0.9616038858265283 |
| 0.4985986033019359 | 0.4985986266505478  | 0.8970695775410269 |
| 0.4998395284544074 | 0.4998395518030194  | 0.6989843979439646 |

|                    |                     |                    |
|--------------------|---------------------|--------------------|
| 0.4890207072026934 | -0.0109792056590386 | 0.9042487965990511 |
| 0.4830407717997035 | -0.0169591410620279 | 0.5029603713163326 |
| 0.5006534925190658 | 0.0006535796573341  | 0.6983273325696934 |
| 0.3300044128087543 | 0.3300042696637033  | 0.8337533093319419 |
| 0.3366622718316921 | 0.3366621286866407  | 0.6308109763823398 |
| 0.1660130915027810 | 0.6660130199302521  | 0.7662369531445955 |
| 0.1776458768191539 | 0.6776458052466247  | 0.5603154891152378 |
| 0.1836258122221429 | 0.6836257406496131  | 0.9616038858265283 |
| 0.1668268812908960 | 0.1668270477845664  | 0.7655798877703243 |
| 0.1680678064433679 | 0.1680679729370383  | 0.5674947081732620 |
| 0.9890207575119966 | 0.4890206937223406  | 0.9042487965990511 |
| 0.9830408221090079 | 0.4830407583193506  | 0.5029603713163326 |
| 1.0006535428283680 | 0.5006534790387129  | 0.6983273325696934 |
| 0.8300043624994503 | 0.8300043702823233  | 0.8337533093319419 |
| 0.8366622215223897 | 0.8366622293052627  | 0.6308109763823398 |
| 0.8332876760230321 | 0.3332876200162483  | 0.8325138875924367 |
| 0.8333788343408783 | 0.3333787783340957  | 0.6320503981218450 |
| 0.6668269316001981 | 0.6668269471659442  | 0.7655798877703243 |
| 0.6680678567526716 | 0.6680678723184176  | 0.5674947081732620 |
| 0.3332877999902644 | 0.8332877206348699  | 0.8325138875924367 |
| 0.3333789583081119 | 0.8333788789527161  | 0.6320503981218450 |

Li2V02F\_100\_SURFACE

1.0000000000000000

|                    |                     |                     |
|--------------------|---------------------|---------------------|
| 8.875391999999997  | 0.0000000000000000  | 0.0000000000000000  |
| 0.0000000000000000 | 11.8763810000000003 | 0.0000000000000000  |
| 0.0000000000000000 | 0.0000000000000000  | 50.0000000000000000 |

|    |    |    |    |
|----|----|----|----|
| V  | Li | O  | F  |
| 28 | 56 | 56 | 28 |

Direct

|                    |                    |                    |
|--------------------|--------------------|--------------------|
| 0.8335014525816370 | 0.0000000000000000 | 0.9370991218901933 |
| 0.6562678139020874 | 0.8750016755548345 | 0.8956215259541541 |
| 0.6562678139020874 | 0.1249984086459012 | 0.8956215259541541 |
| 0.4865525797956154 | 0.7499902361859868 | 0.8534714531443476 |
| 0.4865525797956154 | 0.2500098480147480 | 0.8534714531443476 |
| 0.4865470239709472 | 0.0000000000000000 | 0.8534681196110919 |
| 0.3209130264050933 | 0.3749841675399717 | 0.8115016495556433 |
| 0.3209130264050933 | 0.6250158324600282 | 0.8115016495556433 |
| 0.3209257584549507 | 0.1249983378297752 | 0.8115022711891948 |
| 0.3209257584549507 | 0.8750016621702248 | 0.8115022711891948 |
| 0.1553037281175694 | 0.2500050684230467 | 0.7695330862660397 |
| 0.1553037281175694 | 0.7499950157776888 | 0.7695330862660397 |
| 0.1553192448275058 | 0.5000000421003676 | 0.7695384500406955 |
| 0.1553379324901253 | 0.0000000000000000 | 0.7695371465724862 |
| 0.9856132401729170 | 0.1249741637172361 | 0.7273802013426058 |
| 0.9856132401729170 | 0.8750259204834988 | 0.7273802013426058 |
| 0.9856252781844721 | 0.6250021599074875 | 0.7273797567666512 |
| 0.9856252781844721 | 0.3749979242932476 | 0.7273797567666512 |
| 0.8084683144835895 | 0.7499824478519137 | 0.6859054126689276 |
| 0.8084683144835895 | 0.2500175521480863 | 0.6859054126689276 |
| 0.8084157390912738 | 0.5000000421003676 | 0.6859008674332754 |

|                    |                    |                    |
|--------------------|--------------------|--------------------|
| 0.8083538127407297 | 0.0000000000000000 | 0.6858987566315022 |
| 0.8334900551757650 | 0.7500077800628329 | 0.9371012708632416 |
| 0.8334900551757650 | 0.2499922199371670 | 0.9371012708632416 |
| 0.8334799169295908 | 0.5000000421003676 | 0.9371019727865944 |
| 0.6562612480290251 | 0.6250009529053927 | 0.8956234462905410 |
| 0.6562612480290251 | 0.3749990470946075 | 0.8956234462905410 |
| 0.4865221008675903 | 0.5000000421003676 | 0.8534681178755839 |
| 0.4791670573621383 | 0.7499916215568679 | 0.9356360032461895 |
| 0.4791670573621383 | 0.2500084626438672 | 0.9356360032461895 |
| 0.4791687979933595 | 0.5000000421003676 | 0.9356368114469531 |
| 0.4791911229615628 | 0.0000000000000000 | 0.9356376289223834 |
| 0.1554236281104215 | 0.0000000000000000 | 0.9360785521073908 |
| 0.1554083666553794 | 0.5000000421003676 | 0.9360802077807726 |
| 0.1554025284851099 | 0.2499918605886923 | 0.9360801547455606 |
| 0.1554025284851099 | 0.7500081394113086 | 0.9360801547455606 |
| 0.3159739593040624 | 0.8750066879610220 | 0.8961077201896313 |
| 0.3159739593040624 | 0.1249933120389778 | 0.8961077201896313 |
| 0.3159613369674854 | 0.6249970808721991 | 0.8961095971610635 |
| 0.3159613369674854 | 0.3750029191278008 | 0.8961095971610635 |
| 0.9922713049883568 | 0.6250021801902504 | 0.8947314838194037 |
| 0.9922713049883568 | 0.3749978198097495 | 0.8947314838194037 |
| 0.9922770782315276 | 0.8750009575718753 | 0.8947320103889523 |
| 0.9922770782315276 | 0.1249990424281247 | 0.8947320103889523 |
| 0.1495419256932066 | 0.7500024308472116 | 0.8541352114443500 |
| 0.1495419256932066 | 0.2499975691527888 | 0.8541352114443500 |
| 0.1495325718959292 | 0.5000000421003676 | 0.8541373203739923 |
| 0.1495596782367718 | 0.0000000000000000 | 0.8541328828700101 |
| 0.8255047644154485 | 0.5000000421003676 | 0.8527652867212272 |
| 0.8255154469110056 | 0.0000000000000000 | 0.8527580334294558 |
| 0.8255013528964333 | 0.2500034194726101 | 0.8527626066773405 |
| 0.8255013528964333 | 0.7499966647281253 | 0.8527626066773405 |
| 0.9828256335850333 | 0.8749892683423561 | 0.8121101008995005 |
| 0.9828256335850333 | 0.1250108158583793 | 0.8121101008995005 |
| 0.9828196813191528 | 0.6249917189680296 | 0.8121108986156124 |
| 0.9828196813191528 | 0.3750082810319699 | 0.8121108986156124 |
| 0.6590195136159092 | 0.8749784762771975 | 0.8108872130432025 |
| 0.6590195136159092 | 0.1250215237228028 | 0.8108872130432025 |
| 0.6590112028554892 | 0.6249852183888877 | 0.8108889195889100 |
| 0.6590112028554892 | 0.3750148658118479 | 0.8108889195889100 |
| 0.8163306015672129 | 0.2500094090091978 | 0.7702285874081829 |
| 0.8163306015672129 | 0.7499905909908018 | 0.7702285874081829 |
| 0.8163128757633012 | 0.0000000000000000 | 0.7702378047400236 |
| 0.8162797907456453 | 0.5000000421003676 | 0.7702188833232353 |
| 0.4922909379637682 | 0.5000000421003676 | 0.7688649207812669 |
| 0.4923285790195415 | 0.0000000000000000 | 0.7688688457421086 |
| 0.4923329305714876 | 0.7500095031689091 | 0.7688686435439818 |
| 0.4923329305714876 | 0.2499904968310905 | 0.7688686435439818 |
| 0.6495606298060572 | 0.3749909382499033 | 0.7282574456061069 |
| 0.6495606298060572 | 0.6250091459508315 | 0.7282574456061069 |
| 0.6495637651599167 | 0.8749922658201791 | 0.7282492112244587 |
| 0.6495637651599167 | 0.1250077341798206 | 0.7282492112244587 |

|                    |                    |                    |
|--------------------|--------------------|--------------------|
| 0.3258600383569392 | 0.1249791314370923 | 0.7268949267106811 |
| 0.3258600383569392 | 0.8750209527636429 | 0.7268949267106811 |
| 0.3259130575717469 | 0.3750090684700098 | 0.7268936044240730 |
| 0.3259130575717469 | 0.6249910157307249 | 0.7268936044240730 |
| 0.4865045374039573 | 0.2500065970470816 | 0.6869096903117962 |
| 0.4865045374039573 | 0.7499934029529185 | 0.6869096903117962 |
| 0.4864152822106257 | 0.0000000000000000 | 0.6869102037263340 |
| 0.4864243172951375 | 0.5000000421003676 | 0.6869076273580854 |
| 0.1626115710930308 | 0.0000000000000000 | 0.6873493053484586 |
| 0.1626980987172585 | 0.5000000421003676 | 0.6873586078334440 |
| 0.1628260136702407 | 0.2499485229490888 | 0.6873652769030527 |
| 0.1628260136702407 | 0.7500515612516461 | 0.6873652769030527 |
| 0.9812746193228924 | 0.8750045666942643 | 0.9393840892308271 |
| 0.9812746193228924 | 0.1249954333057360 | 0.9393840892308271 |
| 0.6702165971266749 | 0.8750030152523611 | 0.9366886868669190 |
| 0.6702165971266749 | 0.1249969847476387 | 0.9366886868669190 |
| 0.8161971046870792 | 0.0000000000000000 | 0.8961449274517729 |
| 0.8162023248736134 | 0.7500009892877481 | 0.8961467896701169 |
| 0.8162023248736134 | 0.2499990107122519 | 0.8961467896701169 |
| 0.4956380977727243 | 0.7499991370727416 | 0.8948741734524700 |
| 0.4956380977727243 | 0.2500008629272581 | 0.8948741734524700 |
| 0.4956622207111299 | 0.0000000000000000 | 0.8948708143224929 |
| 0.6471007540937039 | 0.1250033404897578 | 0.8541816259269480 |
| 0.6471007540937039 | 0.8749967437109771 | 0.8541816259269480 |
| 0.6470859432939630 | 0.3750059883653566 | 0.8541834587133132 |
| 0.6470859432939630 | 0.6249940958353788 | 0.8541834587133132 |
| 0.3275237342395420 | 0.1250050551783911 | 0.8530982002611806 |
| 0.3275237342395420 | 0.8749950290223445 | 0.8530982002611806 |
| 0.3274942010276624 | 0.3749896521992179 | 0.8530986860081498 |
| 0.3274942010276624 | 0.6250104320015173 | 0.8530986860081498 |
| 0.4800450619449304 | 0.0000000000000000 | 0.8119621063858450 |
| 0.4799991067683065 | 0.5000000421003676 | 0.8119620454098937 |
| 0.4800466152030045 | 0.2500004406995606 | 0.8119615172500143 |
| 0.4800466152030045 | 0.7499996435011741 | 0.8119615172500143 |
| 0.1617873684557794 | 0.2499848380165877 | 0.8110405787334066 |
| 0.1617873684557794 | 0.7500151619834119 | 0.8110405787334066 |
| 0.1618168886399981 | 0.5000000421003676 | 0.8110423209696013 |
| 0.1618180025874743 | 0.0000000000000000 | 0.8110408772558592 |
| 0.3143393474848548 | 0.3749949267295579 | 0.7699055556365053 |
| 0.3143393474848548 | 0.6250051574711768 | 0.7699055556365053 |
| 0.3143146372946899 | 0.8750013539508170 | 0.7699063178485359 |
| 0.3143146372946899 | 0.1249987302499189 | 0.7699063178485359 |
| 0.9947476416824802 | 0.8750018251962857 | 0.7688246233592121 |
| 0.9947476416824802 | 0.1249982590044501 | 0.7688246233592121 |
| 0.9947455302528929 | 0.3750158137572295 | 0.7688221385953857 |
| 0.9947455302528929 | 0.6249842704435056 | 0.7688221385953857 |
| 0.1462146333268665 | 0.0000000000000000 | 0.7281265997507403 |
| 0.1462213599520992 | 0.5000000421003676 | 0.7281293842256195 |
| 0.1462215147445955 | 0.2500055385957318 | 0.7281296240209819 |
| 0.1462215147445955 | 0.7499945456050036 | 0.7281296240209819 |
| 0.8257154741537639 | 0.7500125813272815 | 0.7268529302616876 |

|                    |                    |                    |
|--------------------|--------------------|--------------------|
| 0.8257154741537639 | 0.2499875028734535 | 0.7268529302616876 |
| 0.8256581239597776 | 0.5000000421003676 | 0.7268592420625203 |
| 0.8256991911442753 | 0.0000000000000000 | 0.7268603657733491 |
| 0.9716696131351009 | 0.6249929093425182 | 0.6863127019865103 |
| 0.9716696131351009 | 0.3750070906574818 | 0.6863127019865103 |
| 0.9716947431475786 | 0.8750259761298034 | 0.6863123405841679 |
| 0.9716947431475786 | 0.1249740238701965 | 0.6863123405841679 |
| 0.6606198944420761 | 0.6250019340230761 | 0.6836213229695757 |
| 0.6606198944420761 | 0.3749981501776589 | 0.6836213229695757 |
| 0.6606488145797340 | 0.8750193348891396 | 0.6836204229209453 |
| 0.6606488145797340 | 0.1249806651108599 | 0.6836204229209453 |
| 0.9812612855225959 | 0.6250024687095486 | 0.9393860549079099 |
| 0.9812612855225959 | 0.3749975312904515 | 0.9393860549079099 |
| 0.6701986085290234 | 0.6249993900856499 | 0.9366907736764658 |
| 0.6701986085290234 | 0.3750006941150857 | 0.9366907736764658 |
| 0.8161870244537527 | 0.5000000421003676 | 0.8961467193323386 |
| 0.4956445590900831 | 0.5000000421003676 | 0.8948699892154127 |
| 0.3215711182758504 | 0.6250043102965861 | 0.9366071995475115 |
| 0.3215711182758504 | 0.3749956897034139 | 0.9366071995475115 |
| 0.3215755848631968 | 0.8750007528293005 | 0.9366041929481744 |
| 0.3215755848631968 | 0.1249993313714345 | 0.9366041929481744 |
| 0.1530020958510606 | 0.0000000000000000 | 0.8952232979585825 |
| 0.1529790347759741 | 0.5000000421003676 | 0.8952242162527131 |
| 0.1529881932834303 | 0.2499998660162503 | 0.8952239598926806 |
| 0.1529881932834303 | 0.7500001339837502 | 0.8952239598926806 |
| 0.9869330016065776 | 0.8749941118510824 | 0.8532614215678447 |
| 0.9869330016065776 | 0.1250058881489174 | 0.8532614215678447 |
| 0.9869252021413295 | 0.3749924080284359 | 0.8532642003646423 |
| 0.9869252021413295 | 0.6250075919715640 | 0.8532642003646423 |
| 0.8208924060101545 | 0.0000000000000000 | 0.8114934320425866 |
| 0.8208835426159892 | 0.7499903229647248 | 0.8114941504626839 |
| 0.8208835426159892 | 0.2500096770352752 | 0.8114941504626839 |
| 0.8208725179036437 | 0.5000000421003676 | 0.8114930558605271 |
| 0.6548548269488481 | 0.8750064829472789 | 0.7697227730517401 |
| 0.6548548269488481 | 0.1249935170527205 | 0.7697227730517401 |
| 0.6548310656811674 | 0.3750005038158752 | 0.7697225503569274 |
| 0.6548310656811674 | 0.6249994961841248 | 0.7697225503569274 |
| 0.4887915050226329 | 0.5000000421003676 | 0.7277668738887588 |
| 0.4887619361032489 | 0.0000000000000000 | 0.7277623398671107 |
| 0.4887915435179781 | 0.7500113411997812 | 0.7277637774701065 |
| 0.4887915435179781 | 0.2499886588002189 | 0.7277637774701065 |
| 0.3203149632409799 | 0.3749845974075838 | 0.6863851496314313 |
| 0.3203149632409799 | 0.6250154025924168 | 0.6863851496314313 |
| 0.3202614657975925 | 0.1249909843487028 | 0.6863758101455103 |
| 0.3202614657975925 | 0.8750090998520326 | 0.6863758101455103 |

Li2V02F\_110\_SURFACE

1.0000000000000000

8.875391999999997

0.0000000000000000

0.0000000000000000

-3.0717460000000001 16.7457710000000013 0.0000000000000000  
0.0000000000000000 0.0000000000000000 50.0000000000000000

V Li O F  
24 48 48 24

Direct

|                    |                    |                    |
|--------------------|--------------------|--------------------|
| 0.6432478375918447 | 0.4318194762011680 | 0.9980241371672346 |
| 0.3908972709756368 | 0.6817223838351898 | 0.9987119204371769 |
| 0.8775484051018184 | 0.1892885258874237 | 0.9978143623313775 |
| 0.1310885071478418 | 0.9422868348114823 | 0.9981099581804160 |
| 0.2625890253592792 | 0.8124513206963356 | 0.9744843879745416 |
| 0.0144947891211532 | 0.0651394884631597 | 0.9726230849752415 |
| 0.5116529375320846 | 0.5594979143546854 | 0.9734989635246737 |
| 0.7631626176873614 | 0.3117019447107457 | 0.9724056698153145 |
| 0.3879557358194380 | 0.6871908447454426 | 0.9409970433804233 |
| 0.1410978336359160 | 0.9385694023566498 | 0.9402778816641990 |
| 0.6380195551298518 | 0.4371202729923151 | 0.9397145405070083 |
| 0.8901276640744555 | 0.1880040734781368 | 0.9393971868397833 |
| 0.2653650331007755 | 0.8129811477148978 | 0.9121603382033119 |
| 0.0160729291789632 | 0.0633157866848975 | 0.9109916122535608 |
| 0.5147184695446857 | 0.5632847411140948 | 0.9117132075858539 |
| 0.7661334537850739 | 0.3131018824300756 | 0.9108514374962738 |
| 0.1447655087095144 | 0.9399586121077050 | 0.8784699334981906 |
| 0.8947385422883579 | 0.1903172093319540 | 0.8775632626260480 |
| 0.3922513668413575 | 0.6894559063620641 | 0.8793095660567225 |
| 0.6427024094758325 | 0.4401654308688122 | 0.8779189897616463 |
| 0.7658899902790774 | 0.3193793620211881 | 0.8528316327165305 |
| 0.5318857425380917 | 0.5675089580858441 | 0.8536634807140141 |
| 0.0150833006848186 | 0.0673017012517547 | 0.8529824006126555 |
| 0.2669310812929889 | 0.8178661295431197 | 0.8540326730299189 |
| 0.5421620798207204 | 0.1885128931502965 | 0.9936290664814683 |
| 0.9815593037826065 | 0.4389927543685649 | 0.9940282169913057 |
| 0.2992620971475274 | 0.4313136376404380 | 0.9936531031266990 |
| 0.2245959803344835 | 0.1949595447551394 | 0.9936540411954254 |
| 0.7934454131645481 | 0.9327805832483275 | 0.9937665436507011 |
| 0.7332342952523487 | 0.7053650170395642 | 0.9942685286376604 |
| 0.0466298589218824 | 0.6695632134339033 | 0.9936384337893908 |
| 0.4764313124817680 | 0.9589382381274679 | 0.9938305796269779 |
| 0.3436011242449852 | 0.0666334820576804 | 0.9717635499594751 |
| 0.8426236900827053 | 0.5592361176281857 | 0.9727127032845906 |
| 0.5883277027918351 | 0.8142178048043026 | 0.9733886811275916 |
| 0.0962227932765874 | 0.3118173951926634 | 0.9719650202051142 |
| 0.9321800151371057 | 0.8155764582128103 | 0.9722476121025924 |
| 0.4253328779166513 | 0.3131332023926259 | 0.9714816830941339 |
| 0.1795220188206752 | 0.5598228536541817 | 0.9717091866652466 |
| 0.6773100186540252 | 0.0663430287768283 | 0.9712797116806725 |
| 0.4754769113567663 | 0.9400301446412331 | 0.9397004908335925 |
| 0.5493527119543576 | 0.1868983333998877 | 0.9383561190797008 |
| 0.3008116491784609 | 0.4356017240532133 | 0.9386793255668027 |
| 0.7271419089377441 | 0.6898469987182019 | 0.9397509172946690 |
| 0.2273830796468538 | 0.1908730825972447 | 0.9384265751325247 |
| 0.8022894430727625 | 0.9366556100111484 | 0.9386495413834020 |

|                    |                    |                    |
|--------------------|--------------------|--------------------|
| 0.0534002308928966 | 0.6856275919701758 | 0.9393258274273451 |
| 0.9787913515289899 | 0.4391202652276883 | 0.9389145962388743 |
| 0.1778337109245449 | 0.5610691771096619 | 0.9127831671141504 |
| 0.6757601724963380 | 0.0612706150803775 | 0.9121036513085112 |
| 0.9272243447307653 | 0.8111502827192982 | 0.9128873304353130 |
| 0.4256182017308447 | 0.3115065279712440 | 0.9118101273809593 |
| 0.6001747680801858 | 0.8148946595970271 | 0.9137766951052255 |
| 0.1028312091449827 | 0.3151630285902838 | 0.9121533973245279 |
| 0.3517506270666501 | 0.0656927614440380 | 0.9126766920074142 |
| 0.8535785500215732 | 0.5651616835880741 | 0.9129102455380457 |
| 0.3172276735370033 | 0.4371410436181680 | 0.8782352907631434 |
| 0.2282831522428518 | 0.1853845107816457 | 0.8798618674029559 |
| 0.4779857704855018 | 0.9343442845169897 | 0.8810715732163228 |
| 0.5659402576989087 | 0.1858171550937967 | 0.8777345820181214 |
| 0.8168748009819873 | 0.9341602645681683 | 0.8784185318199561 |
| 0.7321279550598284 | 0.6865755317600347 | 0.8811551699715719 |
| 0.0665019989469980 | 0.6855186844857313 | 0.8787655515878159 |
| 0.9806260523462363 | 0.4360013994409928 | 0.8800455179672045 |
| 0.8652572685397569 | 0.5631395143553852 | 0.8576620643514733 |
| 0.3580228084787785 | 0.0646112828695681 | 0.8577339438509074 |
| 0.1087423247087144 | 0.3161437928048594 | 0.8575033361848222 |
| 0.6067244168500068 | 0.8130193269125924 | 0.8585666372482724 |
| 0.4234535176637214 | 0.2960476141351131 | 0.8571346611589256 |
| 0.9254090518837529 | 0.7949286536178131 | 0.8577290835729272 |
| 0.6722747996493845 | 0.0409551953045031 | 0.8575635075992530 |
| 0.1825607497399105 | 0.5462609564502107 | 0.8580703259622823 |
| 0.1741051795971725 | 0.0607051106851338 | 0.9992634447208270 |
| 0.3480418747080082 | 0.5634838118117690 | 0.9994925489398020 |
| 0.1042330454587366 | 0.8272932751905996 | 0.0002943955884920 |
| 0.5983832925425486 | 0.3128878185106622 | 0.9984955711158794 |
| 0.4163014801513006 | 0.7969020584727949 | 0.0010145110414654 |
| 0.8529002276070882 | 0.0734183322239323 | 0.9989085268386126 |
| 0.6673777116138824 | 0.5464391133860304 | 0.0001872767162271 |
| 0.9232934642927747 | 0.3082974072375981 | 0.9990448788431122 |
| 0.9739851025263674 | 0.9403236739814766 | 0.9708677333494571 |
| 0.4785232938281559 | 0.4353144220335013 | 0.9702608141675663 |
| 0.7240568062594844 | 0.1883813081772081 | 0.9701662396787738 |
| 0.2257097356536504 | 0.6861644990817163 | 0.9714534193705686 |
| 0.8005389967359279 | 0.4352955495958626 | 0.9708231222067321 |
| 0.2990330477017266 | 0.9390682209822360 | 0.9714295870352699 |
| 0.0452937850515915 | 0.1888587707516398 | 0.9704969164524002 |
| 0.5521593821136526 | 0.6850792972250395 | 0.9723124556381815 |
| 0.9210780727589921 | 0.3089082823732278 | 0.9408116756648277 |
| 0.8576332443677651 | 0.0666489351120408 | 0.9402256959634282 |
| 0.1725882110297447 | 0.0596867597462036 | 0.9410382763917334 |
| 0.6085801554739670 | 0.3157802727408108 | 0.9401330253907860 |
| 0.1072539420938092 | 0.8171146696708377 | 0.9414041169600907 |
| 0.6698980784743089 | 0.5584945672105430 | 0.9414414068904590 |
| 0.3553067601402299 | 0.5660271215325627 | 0.9413353712286548 |
| 0.4219751736025469 | 0.8082565070874732 | 0.9423635402015342 |
| 0.0492599650277759 | 0.1841796801412404 | 0.9099753591047300 |

0.5474594150517768 0.6846003403611554 0.9118529908994593  
0.7957269447849861 0.4345366618099889 0.9105284974386136  
0.2992682860967675 0.9343742588311301 0.9110386896624545  
0.7352103493262024 0.1917733626419794 0.9094958670331228  
0.2314704364277690 0.6919279579878467 0.9108547028638643  
0.9846581788804690 0.9418803103326757 0.9102412442740789  
0.4834836169493327 0.4422459297185138 0.9095702749980451  
0.6842421222110678 0.5643513963939946 0.8812684093656313  
0.3611823501183242 0.5643308507765098 0.8803778011313009  
0.1047114094338702 0.8147070572577723 0.8802052074469456  
0.1780124549961405 0.0637896695676893 0.8809817964652098  
0.8538317089739750 0.0645793020973428 0.8791697220879464  
0.9285852810944760 0.3144653909931028 0.8808060939813200  
0.6049955407871216 0.3152897078820834 0.8793123406590820  
0.4281255397494393 0.8138565762939890 0.8821196008915988  
0.4883192918330035 0.4503557283174444 0.8510127147026224  
0.9908698832362803 0.9515564827730314 0.8513806746916548  
0.2417755740971484 0.7024945961631380 0.8518518806829013  
0.7417919912031337 0.2045512275778969 0.8506054372326751  
0.3107936763260657 0.9359492229436079 0.8528784827931805  
0.8112033937858132 0.4380991363104764 0.8525364163499086  
0.5573820838286268 0.6838049815172196 0.8533804195115117  
0.0603719083109240 0.1855754447134655 0.8520411094792371  
0.7621702351184855 0.8172302503581285 0.9968722496374014  
0.2618916931577784 0.3128375697032993 0.9968652748944724  
0.5126490081614458 0.0699977576938563 0.9968116537925418  
0.0107508473624108 0.5575234462071864 0.9969428264619280  
0.6323393504032836 0.9403614080887608 0.9711377311821652  
0.8879619666714204 0.6874546737336981 0.9716407740019123  
0.1388325626654098 0.4361114922549568 0.9694772614041313  
0.3836558472534999 0.1893993554665410 0.9690685841925952  
0.2647547455972655 0.3131496804072533 0.9388227501673658  
0.5156718095093140 0.0644771123916655 0.9393053963323363  
0.0130082244656333 0.5623141614389636 0.9396528162449560  
0.7657898325541787 0.8136840220588050 0.9399036818437295  
0.8889223162466492 0.6879221302105212 0.9128314293567473  
0.6396127587089795 0.9381482687502504 0.9126036197539857  
0.3907031850358217 0.1883767854206890 0.9115061492125975  
0.1389984853002590 0.4380927049624093 0.9119085098456269  
0.2720541860882318 0.3126546838514512 0.8808954835945013  
0.5234631138734190 0.0625942769420169 0.8809380345596943  
0.7732005022830521 0.8113197792641946 0.8814776949153708  
0.0268559683260480 0.5630309585635195 0.8813947886409654  
0.1458715213050728 0.4343983551735532 0.8544732834112020  
0.3952748330572434 0.1835816926945621 0.8542692976269474  
0.6444568520913323 0.9305526716733904 0.8550302265506393  
0.8958185323235377 0.6831912661503057 0.8549488214161105

V L i O F

1.0000000000000000

11.8763819999999996 0.0000000000000000 0.0000000000000000

5.9381909999999998 -10.2853659999999998 0.0000000000000000  
0.0000000000000000 0.0000000000000000 -50.0000000000000000

V Li O F  
48 96 96 48

Direct

|                    |                    |                    |
|--------------------|--------------------|--------------------|
| 0.8314516363253402 | 0.0898317534856493 | 0.4224536757138791 |
| 0.8306830689030889 | 0.0886744464315501 | 0.2776524221639400 |
| 0.5827908126834010 | 0.5911674671704568 | 0.4226763155100193 |
| 0.5786011951732513 | 0.5860705279805886 | 0.1326422165593693 |
| 0.8298714444869045 | 0.0874305166748367 | 0.1328526986044496 |
| 0.5806477522671910 | 0.5886308376733691 | 0.2776427842910631 |
| 0.8286168328121580 | 0.3360433384719283 | 0.1326475594560242 |
| 0.8306597182920679 | 0.3386658434661321 | 0.2776501069001149 |
| 0.8327644079387783 | 0.3411788141998099 | 0.4226766503452798 |
| 0.5799450051499040 | 0.8373769453004160 | 0.1328445939931090 |
| 0.5806781047962620 | 0.8386291578987844 | 0.2776493803095916 |
| 0.5814511163683793 | 0.8398326806853583 | 0.4224559879755279 |
| 0.8306516068918870 | 0.5886423663370789 | 0.2776414010771917 |
| 0.8299419447970700 | 0.5873598874731530 | 0.1328653923221112 |
| 0.8314535510493513 | 0.5898385302778589 | 0.4224463527612616 |
| 0.8327925022136895 | 0.8411656898887167 | 0.4226750099411143 |
| 0.8306888261519020 | 0.8386573023796683 | 0.2776444431855275 |
| 0.8285544458465836 | 0.8360745915260748 | 0.1326204817197019 |
| 0.0785985220208973 | 0.0860397315875198 | 0.1326403765945673 |
| 0.0807014427211641 | 0.0886757127169216 | 0.2776575182980314 |
| 0.0827781656751700 | 0.0911616284674563 | 0.4226845948443639 |
| 0.0806674740549371 | 0.3386812525175318 | 0.2776487737223357 |
| 0.0799615934060364 | 0.3373559194950932 | 0.1328660221550707 |
| 0.0814420707972127 | 0.3398281979476742 | 0.4224520263889157 |
| 0.3299369125180415 | 0.0873937679379105 | 0.1328477369184823 |
| 0.0806519999993503 | 0.5887098868784969 | 0.2776372101314012 |
| 0.0785796501007849 | 0.5860622518254077 | 0.1326274110073200 |
| 0.3307173198896611 | 0.0886547379640868 | 0.2776559779204978 |
| 0.0827960596436894 | 0.5911469868159615 | 0.4226734820422927 |
| 0.3314408315098407 | 0.0898182537153380 | 0.4224587680257856 |
| 0.3285754837986746 | 0.3360831602358598 | 0.1326218853767417 |
| 0.3306656219690931 | 0.3386653136531079 | 0.2776457491621967 |
| 0.3327856245311165 | 0.3411292274136977 | 0.4226745098206011 |
| 0.0798610298752195 | 0.8374196049845479 | 0.1328452617230587 |
| 0.0806455948863257 | 0.8387001520995843 | 0.2776432442859781 |
| 0.0814676964365201 | 0.8398219567845792 | 0.4224596222713613 |
| 0.5827645555832344 | 0.0911612092609842 | 0.4226757518592308 |
| 0.5806724573393831 | 0.0886190139890367 | 0.2776518655437554 |
| 0.3314721852233942 | 0.5898107900093795 | 0.4224545414080990 |
| 0.3298472249527123 | 0.5874587038686963 | 0.1328506047178263 |
| 0.5785493689838355 | 0.0860921947870774 | 0.1326184665665538 |
| 0.3306001117483305 | 0.5886995605727966 | 0.2776396505073163 |
| 0.3285954063079882 | 0.8360520466901853 | 0.1326286744877139 |
| 0.5814506267896409 | 0.3398260688062849 | 0.4224495702244163 |
| 0.5798714206150658 | 0.3374578087762518 | 0.1328574384149541 |
| 0.3306597299239225 | 0.8386578684587223 | 0.2776491572952742 |

|                    |                    |                    |
|--------------------|--------------------|--------------------|
| 0.5806688733341933 | 0.3386470527856103 | 0.2776462240068996 |
| 0.3327845941513748 | 0.8411656214917866 | 0.4226864186023103 |
| 0.4962456999560584 | 0.7540839563113351 | 0.1818737623039277 |
| 0.7479524605215944 | 0.2561416977806729 | 0.3269671187939487 |
| 0.4770976271563543 | 0.7355059989067964 | 0.4774212528703456 |
| 0.7518255858748578 | 0.2602739267209507 | 0.4679567726125189 |
| 0.7462326837644753 | 0.2538641610522018 | 0.1822335303575010 |
| 0.4978010582660281 | 0.7557932213847698 | 0.3269471245314773 |
| 0.4096599771527530 | 0.9168097522839463 | 0.0873491412582598 |
| 0.6635789049367782 | 0.4213704343269129 | 0.2283611279418723 |
| 0.4151829013562148 | 0.9232838530062101 | 0.3730792280936094 |
| 0.6649050897344871 | 0.4233972776670950 | 0.3734277120534366 |
| 0.6846836790196076 | 0.4412506207145697 | 0.0779173685765920 |
| 0.4133391496445417 | 0.9212381104243519 | 0.2283390927848069 |
| 0.9980253049505386 | 0.0061906993524321 | 0.3269738986510669 |
| 0.0018421863185653 | 0.0102785733445812 | 0.4679651490029448 |
| 0.9149747492392918 | 0.1734010608424160 | 0.3734493562065622 |
| 0.7270943076436130 | 0.4854995591726189 | 0.4774182812087693 |
| 0.6596227533396979 | 0.6667391198960183 | 0.0873469585951592 |
| 0.9961422417577273 | 0.0038917786302139 | 0.1822228244026233 |
| 0.9346511064861153 | 0.1913627770225240 | 0.0779089578476203 |
| 0.9136316540796532 | 0.1714196133172790 | 0.2283661132167983 |
| 0.7463453303051634 | 0.5039583401636001 | 0.1818747446322306 |
| 0.7477138044209654 | 0.5059094576160651 | 0.3269421405040119 |
| 0.6633061000096153 | 0.6711685837063772 | 0.2283291365608853 |
| 0.6651110306521291 | 0.6734392757229716 | 0.3730784563421256 |
| 0.9097338437659326 | 0.4167997523654873 | 0.0873663070739245 |
| 0.6634845209362088 | 0.9213937241143542 | 0.2283552171292658 |
| 0.9150704075073089 | 0.4234512956622373 | 0.3730724147929770 |
| 0.9133741985772398 | 0.4211865694033113 | 0.2283384401201047 |
| 0.6651565278062490 | 0.9232038959082646 | 0.3734306405763271 |
| 0.6843479523255148 | 0.9417424517192265 | 0.0778696144516733 |
| 0.9963854046075915 | 0.2539355706392403 | 0.1818825268728444 |
| 0.7480543452976883 | 0.7560376550892223 | 0.3269637068553326 |
| 0.9770675318011283 | 0.2354977873558903 | 0.4774284536097575 |
| 0.9977578676831091 | 0.2559466023651311 | 0.3269480639331678 |
| 0.7518827534095345 | 0.7602639071365435 | 0.4679513162943384 |
| 0.7461102839999626 | 0.7539157137698547 | 0.1822243442508676 |
| 0.9134923005252340 | 0.6714388418442997 | 0.2283461999926636 |
| 0.0018316290128285 | 0.5102909116014024 | 0.4679462287488244 |
| 0.9150680433591002 | 0.6733234273319307 | 0.3734310421971041 |
| 0.9341010234304663 | 0.6916779066356283 | 0.0779141406073568 |
| 0.9962395606953374 | 0.5039148852615007 | 0.1822303577266328 |
| 0.9979810657766560 | 0.5061192821723013 | 0.3269659550634010 |
| 0.9770883009192400 | 0.7355171522182696 | 0.4774116455883617 |
| 0.9961580932988559 | 0.7540695900068178 | 0.1818601401281196 |
| 0.9978050393201547 | 0.7559566340408186 | 0.3269335558343928 |
| 0.9151924826246954 | 0.9234283872895563 | 0.3730779832177463 |
| 0.9095180316707957 | 0.9169820859333191 | 0.0873491650054555 |
| 0.9132898367852457 | 0.9212540561842647 | 0.2283293345134041 |
| 0.1596800841123617 | 0.1668040481048248 | 0.0873677031121406 |

|                    |                    |                    |
|--------------------|--------------------|--------------------|
| 0.2270799259781415 | 0.9854838728378538 | 0.4774344566223537 |
| 0.2478615873310342 | 0.0058753923282930 | 0.3269519302018440 |
| 0.1634526849587304 | 0.1712898067308500 | 0.2283375806072961 |
| 0.2462994183183981 | 0.0040753410562508 | 0.1818717919464392 |
| 0.1651168205734567 | 0.1733807811153656 | 0.3730823294787359 |
| 0.2480069989747751 | 0.2560182229818055 | 0.3269727715596381 |
| 0.2462441410329567 | 0.2539864107137148 | 0.1822262621453352 |
| 0.2518371716858754 | 0.2602986766111977 | 0.4679519784316327 |
| 0.1635501702186338 | 0.4215393333669039 | 0.2283455496388714 |
| 0.1844502402111248 | 0.4415260510354231 | 0.0778879320739358 |
| 0.1650202799564768 | 0.4232424699186209 | 0.3734291860344331 |
| 0.4961504997037480 | 0.0039771161797638 | 0.1822197525918921 |
| 0.4980910351779775 | 0.0059740867108818 | 0.3269687024587923 |
| 0.5018725629555699 | 0.0102736220841942 | 0.4679554898453022 |
| 0.4344255870503129 | 0.1918542489585652 | 0.0778428359558898 |
| 0.4135987932329682 | 0.1714667729234158 | 0.2283507717463701 |
| 0.4150267790406661 | 0.1731976489544217 | 0.3734191650227807 |
| 0.2462798448830436 | 0.5040609114164980 | 0.1818738633374846 |
| 0.2477014528715842 | 0.5058676280346643 | 0.3269405856059382 |
| 0.2270467269532660 | 0.4855417725615112 | 0.4774136588684561 |
| 0.1593406857488932 | 0.6668655634056528 | 0.0873350317846125 |
| 0.1632186479960577 | 0.6713576639657496 | 0.2283241985525957 |
| 0.1651542126096696 | 0.6733459098562279 | 0.3730761580670660 |
| 0.4150387695525689 | 0.4233394565128096 | 0.3730753780986539 |
| 0.4095789587931821 | 0.4171048166897611 | 0.0873648151218568 |
| 0.1635267839077544 | 0.9215509547517308 | 0.2283565033795439 |
| 0.1846185233774486 | 0.9413643765103752 | 0.0778981098540335 |
| 0.4133425070728059 | 0.4213000107487703 | 0.2283286763190201 |
| 0.1650515309000526 | 0.9233047546624701 | 0.3734421723836995 |
| 0.4770681159757640 | 0.2354993750847448 | 0.4774194238439579 |
| 0.4962911239185189 | 0.2540627093410220 | 0.1818689525302880 |
| 0.2479399538392674 | 0.7561435467470308 | 0.3269639067420524 |
| 0.2460973709661159 | 0.7540497614786975 | 0.1822246782485877 |
| 0.4977824266140125 | 0.2558085867134158 | 0.3269491541196911 |
| 0.2518803775727252 | 0.7602413149884025 | 0.4679640146627352 |
| 0.6650706254741653 | 0.1733757047362605 | 0.3730798605587717 |
| 0.7462146697308298 | 0.0039595534815180 | 0.1818580887437154 |
| 0.4978497603780505 | 0.5060759831165329 | 0.3269646701152257 |
| 0.4961858240910198 | 0.5039755544402384 | 0.1822215795277882 |
| 0.4345541196073416 | 0.6913277751559599 | 0.0779099864108098 |
| 0.6633681498720847 | 0.1711687618813900 | 0.2283319953187569 |
| 0.4150106144667256 | 0.6733092599045939 | 0.3734396923641269 |
| 0.7478042462587448 | 0.0058902319731613 | 0.3269471906546979 |
| 0.5018642803132812 | 0.5102643483180966 | 0.4679558888975464 |
| 0.7270977129924487 | 0.9855072925942665 | 0.4774138899019720 |
| 0.6595646196637110 | 0.1669975102571195 | 0.0873581125563874 |
| 0.4134962745413440 | 0.6714782326809211 | 0.2283505106859840 |
| 0.7472634004795531 | 0.2552937634850721 | 0.2548522783735946 |
| 0.4985503382555008 | 0.7569486428369858 | 0.3997025574663373 |
| 0.7447328359435830 | 0.2523607208858508 | 0.1096157976107319 |
| 0.4971292946867661 | 0.7544269579257382 | 0.1103526473377397 |

|                    |                    |                    |
|--------------------|--------------------|--------------------|
| 0.4972510399920529 | 0.7552529130132745 | 0.2548404507446781 |
| 0.7489825347075629 | 0.2573436015333804 | 0.3998201359121891 |
| 0.6640390422144365 | 0.4219930759117000 | 0.3004591655861599 |
| 0.4165755088439728 | 0.9249494084745037 | 0.4457015447426046 |
| 0.4124243802773583 | 0.9198620063907363 | 0.1554859043047431 |
| 0.6643226058705473 | 0.4227077470133357 | 0.4449564463791911 |
| 0.6627900829909156 | 0.4203345968280001 | 0.1556153450312357 |
| 0.4140943056343586 | 0.9219977143585814 | 0.3004541287911522 |
| 0.9947227716254020 | 0.0023451240505587 | 0.1096093439425929 |
| 0.9972718583627798 | 0.0053871193818727 | 0.2548527287082331 |
| 0.9990072173245406 | 0.0073523346969593 | 0.3998265130497645 |
| 0.9127784783651453 | 0.1702963385923283 | 0.1556156852138444 |
| 0.9140755894709041 | 0.1721066005165310 | 0.3004660909162798 |
| 0.9143116065942350 | 0.1727295163109959 | 0.4449616305429809 |
| 0.7471365502185816 | 0.5044417204245809 | 0.1103690224415555 |
| 0.7472722333981526 | 0.5052315162786535 | 0.2548357378700611 |
| 0.7485463985295788 | 0.5069326835432756 | 0.3996955660957386 |
| 0.6624072341595382 | 0.6698936369856109 | 0.1554963730630088 |
| 0.6640513818477531 | 0.6719597801848413 | 0.3004419309593186 |
| 0.6665820254336807 | 0.6749481311456222 | 0.4456924180154772 |
| 0.9124602809999103 | 0.4198203183727598 | 0.1555056320554567 |
| 0.6640586358067706 | 0.9220089014102216 | 0.3004619915187071 |
| 0.9165458569725630 | 0.4249941019569045 | 0.4456905005832051 |
| 0.6627853293092993 | 0.9203414112322067 | 0.1555976826968565 |
| 0.9141046449898725 | 0.4220177356921331 | 0.3004482034187924 |
| 0.6643228538030299 | 0.9227109460141765 | 0.4449568207283242 |
| 0.9985393746159251 | 0.2569272349903206 | 0.3997028811168399 |
| 0.9971138559860290 | 0.2544329805615799 | 0.1103673246917359 |
| 0.7448272932363094 | 0.7522130629751710 | 0.1096009089436673 |
| 0.7473133316316266 | 0.7552484477447449 | 0.2548482162067180 |
| 0.9973030124741658 | 0.2552887397321120 | 0.2548450480960975 |
| 0.7489892676480915 | 0.7573516083470414 | 0.3998137265941011 |
| 0.9127947081589306 | 0.6703313712612479 | 0.1556096466516391 |
| 0.9948008132374848 | 0.5022181933592192 | 0.1096302721312502 |
| 0.9140034561873593 | 0.6720876923586024 | 0.3004525807491681 |
| 0.9990051106942613 | 0.5073422053778323 | 0.3998140503249564 |
| 0.9143254926395435 | 0.6727196411618233 | 0.4449529369859920 |
| 0.9972800594135628 | 0.5053193473034681 | 0.2548462229451856 |
| 0.9970193211721330 | 0.7545027348051950 | 0.1103471345284411 |
| 0.9985870533680986 | 0.7569219567146913 | 0.3997011640924674 |
| 0.9972590567935677 | 0.7553330724670124 | 0.2548270242064063 |
| 0.9123353892095973 | 0.9198942206800842 | 0.1554815898633928 |
| 0.9165734463454763 | 0.9249686815526630 | 0.4456958371881871 |
| 0.9140318797344339 | 0.9220815264564431 | 0.3004436210599211 |
| 0.2485520217049510 | 0.0069116093806934 | 0.3997066084906905 |
| 0.1665358698007702 | 0.1749681441221478 | 0.4456968902867930 |
| 0.2473190590796331 | 0.0052468640772760 | 0.2548445018385678 |
| 0.1624595938347270 | 0.1698312581569123 | 0.1554976495019443 |
| 0.1641134719966773 | 0.1720346125905947 | 0.3004536644089529 |
| 0.2471083287622600 | 0.0044397982200751 | 0.1103538157884336 |
| 0.2489871909951572 | 0.2573125646906490 | 0.3998166900830720 |

|                    |                    |                    |
|--------------------|--------------------|--------------------|
| 0.2472992425407802 | 0.2552314063419016 | 0.2548472401662807 |
| 0.2447759672262786 | 0.2523063727853413 | 0.1096013683909790 |
| 0.1639954013215768 | 0.4221750365438058 | 0.3004533810838516 |
| 0.1628392027314966 | 0.4203225823208477 | 0.1556152797943028 |
| 0.1643363922045771 | 0.4226863011594527 | 0.4449568993498416 |
| 0.4948001253766568 | 0.0022664257826948 | 0.1096025898274844 |
| 0.4973609928794280 | 0.0051883961794641 | 0.2548497927583158 |
| 0.4989835950346510 | 0.0073416105311687 | 0.3998225831963538 |
| 0.4128036634097274 | 0.1703518987820460 | 0.1556035653305466 |
| 0.4140359388226031 | 0.1721131299507280 | 0.3004620714168834 |
| 0.4143073508198745 | 0.1726946112192389 | 0.4449619615984471 |
| 0.2470364271597758 | 0.5045263173940525 | 0.1103424877256012 |
| 0.2472484628366247 | 0.5052206244891208 | 0.2548255233634114 |
| 0.2485747470527717 | 0.5069030949119997 | 0.3996979237245931 |
| 0.1623357246908993 | 0.6699065485323167 | 0.1554830214707100 |
| 0.1640017082389590 | 0.6721289117075588 | 0.3004439813985326 |
| 0.1665825412117289 | 0.6749190965890272 | 0.4456976020788379 |
| 0.4165781661270502 | 0.4249503972466274 | 0.4456916942121852 |
| 0.4123410730873029 | 0.4199202296139622 | 0.1554884541264848 |
| 0.1640788154384442 | 0.9220829042910174 | 0.3004597426309901 |
| 0.4140189568083996 | 0.4220860495258504 | 0.3004417261600162 |
| 0.1643163683742122 | 0.9227006734854617 | 0.4449700243173694 |
| 0.1627702186998553 | 0.9203185494328030 | 0.1556086735699172 |
| 0.4970403616800448 | 0.2545546612479800 | 0.1103405501189182 |
| 0.2472342110928865 | 0.7552975190613180 | 0.2548399790731702 |
| 0.4973057418697603 | 0.2552354102986583 | 0.2548366314537263 |
| 0.4985274746941015 | 0.2569104366024824 | 0.3996957343681919 |
| 0.2490192675962426 | 0.7573273759143164 | 0.3998270097482857 |
| 0.2447036986079430 | 0.7523464390915928 | 0.1096033260848777 |
| 0.7470241551177397 | 0.0045433574032808 | 0.1103429270949913 |
| 0.4971983788648489 | 0.5053237896937871 | 0.2548437429431657 |
| 0.6640787741925670 | 0.1719724293152628 | 0.3004483688504697 |
| 0.4143413835034318 | 0.6727034659593663 | 0.4449616039127366 |
| 0.7472958867395751 | 0.0052553159184027 | 0.2548371430777834 |
| 0.4990031024752955 | 0.5073491436465152 | 0.3998174526256306 |
| 0.6623159119612715 | 0.1699195869236799 | 0.1554867808345388 |
| 0.4140461871378332 | 0.6720532586551881 | 0.3004568278033745 |
| 0.6665617737550468 | 0.1749601463667030 | 0.4456898582685502 |
| 0.4947269980145957 | 0.5023513965845288 | 0.1096204486101710 |
| 0.4127485715553394 | 0.6703720229121959 | 0.1556049534184660 |
| 0.7485641714082342 | 0.0069157059395486 | 0.3997041795161118 |
| 0.5940745472353723 | 0.6007595158362621 | 0.0637064016309858 |
| 0.8315334078955022 | 0.0896392165808033 | 0.3501185739986196 |
| 0.5675648339503498 | 0.5759705051588597 | 0.4916234077080084 |
| 0.8298909331520515 | 0.0876357991732697 | 0.2051849291215067 |
| 0.5815171143082620 | 0.5897525376789370 | 0.3500988878464578 |
| 0.5797392276794358 | 0.5876561609051422 | 0.2052015188825621 |
| 0.8442045286718703 | 0.3509161502050600 | 0.0637033919428830 |
| 0.8175316953930574 | 0.3259647406296982 | 0.4916283704425449 |
| 0.5798830554835708 | 0.8376299347783055 | 0.2051887810634115 |
| 0.8298452671370641 | 0.3375374938491831 | 0.2052095744045407 |

|                    |                    |                    |
|--------------------|--------------------|--------------------|
| 0.8315317633968448 | 0.3397773553995368 | 0.3500989414693939 |
| 0.5815536181687121 | 0.8395900385785109 | 0.3501186745359999 |
| 0.8298292136032651 | 0.5876851368530521 | 0.2051852660155408 |
| 0.8314942830806022 | 0.5896735179741174 | 0.3501091642564628 |
| 0.0941686727857985 | 0.1009309830561119 | 0.0636998964943561 |
| 0.0798088713803183 | 0.0876385739082476 | 0.2052105239652064 |
| 0.0815764655382752 | 0.0897351907385874 | 0.3500995173880667 |
| 0.0675541824109580 | 0.0759816818077992 | 0.4916341776760873 |
| 0.8438831103762040 | 0.8512067801109844 | 0.0636850290346818 |
| 0.8297254142953864 | 0.8376155062198932 | 0.2052009824405251 |
| 0.8175761388439717 | 0.8259903955505342 | 0.4916192099992090 |
| 0.8316031358236945 | 0.8397611160771145 | 0.3500917973734463 |
| 0.0814306027266270 | 0.3396700757613295 | 0.3501150022914132 |
| 0.0799197857059614 | 0.3376515823823806 | 0.2051925296764962 |
| 0.3298859139079435 | 0.0877667052997879 | 0.2051948205382071 |
| 0.0815785607284050 | 0.5897601577815398 | 0.3500827436641582 |
| 0.0797151562283365 | 0.5876545829508280 | 0.2052098675171983 |
| 0.0935983186400181 | 0.6010242394601956 | 0.0637000100532776 |
| 0.3315001074439467 | 0.0895903564028234 | 0.3501106358791101 |
| 0.0675360867085028 | 0.5759874533101268 | 0.4916170527637381 |
| 0.3439917168089872 | 0.3514102531214138 | 0.0636736060953581 |
| 0.3298154577786569 | 0.3376670332857915 | 0.2051957903204302 |
| 0.3315597051681571 | 0.3397114875401746 | 0.3501031823055845 |
| 0.3175539914157843 | 0.3260302908836899 | 0.4916156143260516 |
| 0.0797896899667282 | 0.8377401240186580 | 0.2051766928435571 |
| 0.0814856449349910 | 0.8397482399387767 | 0.3501129166063316 |
| 0.5816786054118129 | 0.0896534093861218 | 0.3500918574717863 |
| 0.5675935205862458 | 0.0759879848657469 | 0.4916208455431827 |
| 0.5939610712151633 | 0.1012747163863556 | 0.0636708952450035 |
| 0.3298752792364811 | 0.5877776786413694 | 0.2051878972973949 |
| 0.5797732030239042 | 0.0875839110415302 | 0.2052070106160799 |
| 0.3314291178780404 | 0.5896414115647882 | 0.3501063793853284 |
| 0.5799246980239168 | 0.3376878452047555 | 0.2051867581156626 |
| 0.3316129180577033 | 0.8397232148676934 | 0.3500949678156359 |
| 0.5814369324650089 | 0.3396694392852905 | 0.3501132154542417 |
| 0.3175840420994078 | 0.8259503404361417 | 0.4916324788769694 |
| 0.3297452599559449 | 0.8376356328397810 | 0.2052082905938452 |
| 0.3441495340791625 | 0.8508767199011038 | 0.0636930668276899 |

INTERFACE\_100

1.0000000000000000

8.7673160278497289 0.0000000000000000 0.0160691995853848

0.0000000000000000 11.7127653569207286 0.0000000000000000

0.0552671213241630 0.0000000000000000 33.0301963407614849

V Li O F  
32 160 64 128

Direct

|                    |                    |                    |
|--------------------|--------------------|--------------------|
| 0.4891919932709764 | 0.7500031859488091 | 0.4116954717660984 |
| 0.4891919932709764 | 0.2499968140511910 | 0.4116954717660984 |
| 0.4891903601316017 | 0.0000000000000000 | 0.4116963721342865 |
| 0.4891825097436390 | 0.5000000421003676 | 0.4116915145924605 |

|                    |                    |                    |
|--------------------|--------------------|--------------------|
| 0.3138661459685747 | 0.6249938070863938 | 0.3483919021456461 |
| 0.3138661459685747 | 0.3750061929136080 | 0.3483919021456461 |
| 0.3138910027414361 | 0.1249961006256272 | 0.3483885287671308 |
| 0.3138910027414361 | 0.8750039835751110 | 0.3483885287671308 |
| 0.1450561466950611 | 0.2500086328104527 | 0.2843566299622458 |
| 0.1450561466950611 | 0.7499914513902810 | 0.2843566299622458 |
| 0.1450717210057702 | 0.0000000000000000 | 0.2843534109891470 |
| 0.1450359561596243 | 0.5000000421003676 | 0.2843589095689803 |
| 0.9777189758977604 | 0.3750020684531718 | 0.2200864526392237 |
| 0.9777189758977604 | 0.6249979315468238 | 0.2200864526392237 |
| 0.9777617051086213 | 0.1250003940004003 | 0.2200959990595285 |
| 0.9777617051086213 | 0.8749996059996008 | 0.2200959990595285 |
| 0.8107520437049577 | 0.2500012936047444 | 0.1558722434837085 |
| 0.8107520437049577 | 0.7499987905959916 | 0.1558722434837085 |
| 0.8107281016771734 | 0.5000000421003676 | 0.1558632774846188 |
| 0.8107675408629016 | 0.0000000000000000 | 0.1558806366628906 |
| 0.6444120424976211 | 0.1249967855428902 | 0.0915528153939478 |
| 0.6444120424976211 | 0.8750032986578448 | 0.0915528153939478 |
| 0.6444046393792237 | 0.6250065101615012 | 0.0915472758062987 |
| 0.6444046393792237 | 0.3749935740392342 | 0.0915472758062987 |
| 0.4771886593030915 | 0.7500062193438399 | 0.0274368686398760 |
| 0.4771886593030915 | 0.2499937806561569 | 0.0274368686398760 |
| 0.4771923286137971 | 0.5000000421003676 | 0.0274373812771193 |
| 0.4771890833141377 | 0.0000000000000000 | 0.0274396542354417 |
| 0.3034895268892742 | 0.8750041592903197 | 0.9640646761164149 |
| 0.3034895268892742 | 0.1249958407096809 | 0.9640646761164149 |
| 0.3034964239717273 | 0.6250010469549828 | 0.9640685447015737 |
| 0.3034964239717273 | 0.3749990372457529 | 0.9640685447015737 |
| 0.8129785080127206 | 0.0000000000000000 | 0.9018163972252580 |
| 0.6486553773825471 | 0.8750011467830752 | 0.8396253218062962 |
| 0.6486553773825471 | 0.1249989374176591 | 0.8396253218062962 |
| 0.4825325722078691 | 0.7500400217901873 | 0.7791565723441390 |
| 0.4825325722078691 | 0.2499600624105504 | 0.7791565723441390 |
| 0.4825374538332080 | 0.0000000000000000 | 0.7791560668510513 |
| 0.3170805721004762 | 0.3749774720473589 | 0.7183373365410661 |
| 0.3170805721004762 | 0.6250225279526415 | 0.7183373365410661 |
| 0.3170858443713343 | 0.1249988506196396 | 0.7183386121735083 |
| 0.3170858443713343 | 0.8750011493803549 | 0.7183386121735083 |
| 0.1513376392578619 | 0.2499821560106682 | 0.6575803584098404 |
| 0.1513376392578619 | 0.7500179281900662 | 0.6575803584098404 |
| 0.1513546918602696 | 0.5000000421003676 | 0.6575891378087956 |
| 0.1513425877662176 | 0.0000000000000000 | 0.6575909322953218 |
| 0.9846762664881981 | 0.1249833206405265 | 0.5969712583698055 |
| 0.9846762664881981 | 0.8750167635602081 | 0.5969712583698055 |
| 0.9846900104376778 | 0.6250183513321194 | 0.5969688092223354 |
| 0.9846900104376778 | 0.3749817328686106 | 0.5969688092223354 |
| 0.8192221727059047 | 0.7500186429141704 | 0.5363874565626202 |
| 0.8192221727059047 | 0.2499813570858291 | 0.5363874565626202 |
| 0.8192389438855655 | 0.5000000421003676 | 0.5363914388786614 |
| 0.8192435556754295 | 0.0000000000000000 | 0.5363928314407556 |
| 0.6645334210246939 | 0.8750102435660079 | 0.4748512778872995 |

|                    |                    |                    |
|--------------------|--------------------|--------------------|
| 0.6645334210246939 | 0.1249897564339934 | 0.4748512778872995 |
| 0.6645257043610440 | 0.6249973071194587 | 0.4748494309521722 |
| 0.6645257043610440 | 0.3750027770812816 | 0.4748494309521722 |
| 0.8129887881667672 | 0.7500076012295296 | 0.9018209714918954 |
| 0.8129887881667672 | 0.2499923987704636 | 0.9018209714918954 |
| 0.8129869293566011 | 0.5000000421003676 | 0.9018197647707444 |
| 0.6486543083080553 | 0.6249941011078711 | 0.8396210208851352 |
| 0.6486543083080553 | 0.3750058988921249 | 0.8396210208851352 |
| 0.4824710060453834 | 0.5000000421003676 | 0.7791539501119726 |
| 0.4905103296043050 | 0.7500081103265751 | 0.9010116733497122 |
| 0.4905103296043050 | 0.2499919738741603 | 0.9010116733497122 |
| 0.4905067206389376 | 0.5000000421003676 | 0.9010150284912789 |
| 0.4905182821979557 | 0.0000000000000000 | 0.9010093755974660 |
| 0.1295024018343154 | 0.0000000000000000 | 0.9009152255221927 |
| 0.1295184399605506 | 0.5000000421003676 | 0.9009252369818611 |
| 0.1295134447061998 | 0.2499981750291357 | 0.9009201702713715 |
| 0.1295134447061998 | 0.7500018249708635 | 0.9009201702713715 |
| 0.3131494231192458 | 0.8750001662235573 | 0.8396126297461919 |
| 0.3131494231192458 | 0.1249998337764416 | 0.8396126297461919 |
| 0.3131544655420992 | 0.6250087125273982 | 0.8396171295417787 |
| 0.3131544655420991 | 0.3749912874726051 | 0.8396171295417787 |
| 0.9776984706334788 | 0.6250059935744667 | 0.8393852247666153 |
| 0.9776984706334788 | 0.3749940064255374 | 0.8393852247666153 |
| 0.9776815993476855 | 0.8750095399101331 | 0.8393802185094189 |
| 0.9776815993476855 | 0.1249904600898681 | 0.8393802185094189 |
| 0.1483517634560843 | 0.7500007608106138 | 0.7791269135027127 |
| 0.1483517634560843 | 0.2499992391893872 | 0.7791269135027127 |
| 0.1483515237017766 | 0.5000000421003676 | 0.7791287210442714 |
| 0.1483343873458239 | 0.0000000000000000 | 0.7791263166914938 |
| 0.8149009278458038 | 0.5000000421003676 | 0.7787723273069486 |
| 0.8148566241689685 | 0.0000000000000000 | 0.7787748557492269 |
| 0.8148781149997095 | 0.2499764415942460 | 0.7787776706139995 |
| 0.8148781149997095 | 0.7500236426064902 | 0.7787776706139995 |
| 0.9836593097314597 | 0.8750115248195800 | 0.7182119958930029 |
| 0.9836593097314597 | 0.1249885593811537 | 0.7182119958930029 |
| 0.9836793631636901 | 0.6250287819986847 | 0.7182081245614229 |
| 0.9836793631636901 | 0.3749712180013143 | 0.7182081245614229 |
| 0.6498597512452997 | 0.8750231138351657 | 0.7181456187163993 |
| 0.6498597512452997 | 0.1249768861648356 | 0.7181456187163993 |
| 0.6498448737922693 | 0.6250015543439875 | 0.7181506255256755 |
| 0.6498448737922693 | 0.3749985298567478 | 0.7181506255256755 |
| 0.8175389915373849 | 0.2499692413392655 | 0.6575238504541111 |
| 0.8175389915373849 | 0.7500307586607390 | 0.6575238504541111 |
| 0.8175711346671027 | 0.0000000000000000 | 0.6575229269912256 |
| 0.8175727314908325 | 0.5000000421003676 | 0.6575184669788148 |
| 0.4840391122281067 | 0.5000000421003676 | 0.6574005922465511 |
| 0.4840707473803147 | 0.0000000000000000 | 0.6574034477647570 |
| 0.4840811972456072 | 0.7500208109682834 | 0.6574055941845270 |
| 0.4840811972456072 | 0.2499791890317183 | 0.6574055941845270 |
| 0.6512183141892831 | 0.3749864110536682 | 0.5966550570651367 |
| 0.6512183141892831 | 0.6250136731470707 | 0.5966550570651367 |

|                    |                    |                    |
|--------------------|--------------------|--------------------|
| 0.6512288439051120 | 0.8750221972772337 | 0.5966548174221213 |
| 0.6512288439051120 | 0.1249778027227657 | 0.5966548174221213 |
| 0.3170193506312368 | 0.1249900175216942 | 0.5966168799469658 |
| 0.3170193506312368 | 0.8750100666790424 | 0.5966168799469658 |
| 0.3170225041093332 | 0.3749854469716125 | 0.5966162622057684 |
| 0.3170225041093332 | 0.6250146372291203 | 0.5966162622057684 |
| 0.4839008803779257 | 0.2499838989561425 | 0.5361937099681142 |
| 0.4839008803779257 | 0.7500161010438599 | 0.5361937099681142 |
| 0.4838596266947242 | 0.0000000000000000 | 0.5361926560979812 |
| 0.4838610356818095 | 0.5000000421003676 | 0.5361948323180219 |
| 0.1484333405186928 | 0.0000000000000000 | 0.5361765293285380 |
| 0.1484417609482875 | 0.5000000421003676 | 0.5361760561730923 |
| 0.1484438298552245 | 0.2499875682560855 | 0.5361842394774075 |
| 0.1484438298552245 | 0.7500125159446460 | 0.5361842394774075 |
| 0.3038712702229911 | 0.3749904026656462 | 0.4748185489211311 |
| 0.3038712702229911 | 0.6250095973343546 | 0.4748185489211311 |
| 0.3038578548538038 | 0.1250094105828864 | 0.4748200743248902 |
| 0.3038578548538038 | 0.8749905894171102 | 0.4748200743248902 |
| 0.9812834191749193 | 0.3749896208105818 | 0.4740489671677158 |
| 0.9812834191749193 | 0.6250103791894159 | 0.4740489671677158 |
| 0.9812692031893104 | 0.1249958592507693 | 0.4740484372993148 |
| 0.9812692031893104 | 0.8750041407492286 | 0.4740484372993148 |
| 0.1414348499152474 | 0.7500305911577572 | 0.4120608058462940 |
| 0.1414348499152474 | 0.2499694930429798 | 0.4120608058462940 |
| 0.1414065609374382 | 0.5000000421003676 | 0.4120569839800847 |
| 0.1414418602917597 | 0.0000000000000000 | 0.4120631779813641 |
| 0.8118259922403406 | 0.0000000000000000 | 0.4115604495133122 |
| 0.8118246195234583 | 0.5000000421003676 | 0.4115628630370336 |
| 0.8118357016174523 | 0.2500056283972608 | 0.4115590309625010 |
| 0.8118357016174523 | 0.7499943716027400 | 0.4115590309625010 |
| 0.9729206294325495 | 0.8749907293954400 | 0.3492746025781107 |
| 0.9729206294325495 | 0.1250092706045589 | 0.3492746025781107 |
| 0.9729272018493137 | 0.3750238285762611 | 0.3492885784243775 |
| 0.9729272018493137 | 0.6249761714237371 | 0.3492885784243775 |
| 0.6518579514432726 | 0.3749910974303628 | 0.3475037825352589 |
| 0.6518579514432726 | 0.6250089025696369 | 0.3475037825352589 |
| 0.6518667809384626 | 0.8749968876031026 | 0.3475030891847692 |
| 0.6518667809384626 | 0.1250031123969013 | 0.3475030891847692 |
| 0.8060814070064166 | 0.7499947196285640 | 0.2850618978260933 |
| 0.8060814070064166 | 0.2500052803714375 | 0.2850618978260933 |
| 0.8060347196992376 | 0.5000000421003676 | 0.2850641213563834 |
| 0.8061114843549780 | 0.0000000000000000 | 0.2850772430608761 |
| 0.4835709643657835 | 0.5000000421003676 | 0.2830991369207985 |
| 0.4836419700377012 | 0.0000000000000000 | 0.2830838964402458 |
| 0.4836114791476446 | 0.7500124600366489 | 0.2830978221586516 |
| 0.4836114791476446 | 0.2499876241640880 | 0.2830978221586516 |
| 0.6391261447820521 | 0.8749856102210706 | 0.2210170110269561 |
| 0.6391261447820521 | 0.1250144739796679 | 0.2210170110269561 |
| 0.6390924859752743 | 0.6249974346173389 | 0.2210186391656203 |
| 0.6390924859752743 | 0.3750025653826640 | 0.2210186391656203 |
| 0.3156940216182259 | 0.8749922644399968 | 0.2189716872611175 |

|                    |                    |                    |
|--------------------|--------------------|--------------------|
| 0.3156940216182259 | 0.1250077355600041 | 0.2189716872611175 |
| 0.3156636745480187 | 0.6249923527724488 | 0.2189621779718023 |
| 0.3156636745480187 | 0.3750077314282880 | 0.2189621779718023 |
| 0.9810260728798534 | 0.3749972377588593 | 0.9642548095841831 |
| 0.9810260728798534 | 0.6250027622411382 | 0.9642548095841831 |
| 0.9810017105731387 | 0.8750027870752739 | 0.9642563243074235 |
| 0.9810017105731387 | 0.1249972129247271 | 0.9642563243074235 |
| 0.6514306747614763 | 0.3749940569436621 | 0.9638566596072103 |
| 0.6514306747614763 | 0.6250059430563338 | 0.9638566596072103 |
| 0.6514116263881589 | 0.8750161836922000 | 0.9638588555276677 |
| 0.6514116263881589 | 0.1249838163078035 | 0.9638588555276677 |
| 0.4724535831812439 | 0.2499995601507177 | 0.1568619245500379 |
| 0.4724535831812439 | 0.7500004398492848 | 0.1568619245500379 |
| 0.4724535098903249 | 0.0000000000000000 | 0.1568625406553782 |
| 0.4724514120701452 | 0.5000000421003676 | 0.1568671507511198 |
| 0.1490038004872086 | 0.5000000421003676 | 0.1548488209876895 |
| 0.1490445716106215 | 0.0000000000000000 | 0.1548562590204809 |
| 0.1490335657249582 | 0.7499964684501983 | 0.1548551253574184 |
| 0.1490335657249582 | 0.2500035315497992 | 0.1548551253574184 |
| 0.3055795602148956 | 0.3750034376711833 | 0.0926763593773082 |
| 0.3055795602148956 | 0.6249966465295511 | 0.0926763593773082 |
| 0.3055629272232535 | 0.8749936505977415 | 0.0926808643571156 |
| 0.3055629272232535 | 0.1250063494022585 | 0.0926808643571156 |
| 0.9831220730657703 | 0.8750033440994632 | 0.0908249115276345 |
| 0.9831220730657703 | 0.1249967401012753 | 0.0908249115276345 |
| 0.9831435160423314 | 0.3749817874987930 | 0.0908348054850990 |
| 0.9831435160423314 | 0.6250182967019424 | 0.0908348054850990 |
| 0.1391473930248863 | 0.2499916792202914 | 0.0282411858845535 |
| 0.1391473930248863 | 0.7500083207797024 | 0.0282411858845535 |
| 0.1391696629859658 | 0.0000000000000000 | 0.0282392062977032 |
| 0.1391380265255594 | 0.5000000421003676 | 0.0282456469710990 |
| 0.8180624302404340 | 0.0000000000000000 | 0.0266431478759009 |
| 0.8180598881475922 | 0.5000000421003676 | 0.0266337498728046 |
| 0.8180544031781114 | 0.2500129115845073 | 0.0266470124511006 |
| 0.8180544031781114 | 0.7499871726162237 | 0.0266470124511006 |
| 0.4758128538090594 | 0.5000000421003676 | 0.3494570726787299 |
| 0.4758392727124015 | 0.0000000000000000 | 0.3494587276233402 |
| 0.4758032774373428 | 0.2499904827512418 | 0.3494522121984621 |
| 0.4758032774373428 | 0.7500095172487613 | 0.3494522121984621 |
| 0.1506774238423934 | 0.2500067292943963 | 0.3471968120504737 |
| 0.1506774238423934 | 0.7499932707056021 | 0.3471968120504737 |
| 0.1507453083819455 | 0.0000000000000000 | 0.3472094890562434 |
| 0.1506675985877450 | 0.5000000421003676 | 0.3472172447278831 |
| 0.3076492308309290 | 0.1250033752674169 | 0.2858927823250126 |
| 0.3076492308309290 | 0.8749967089333199 | 0.2858927823250126 |
| 0.3076583516195802 | 0.3750373521770227 | 0.2859024733820191 |
| 0.3076583516195802 | 0.6249627320237156 | 0.2859024733820191 |
| 0.9824784866955137 | 0.1249787854339086 | 0.2826759396010652 |
| 0.9824784866955137 | 0.8750212987668265 | 0.2826759396010652 |
| 0.9824815535488427 | 0.3750072269542102 | 0.2826743904387342 |
| 0.9824815535488427 | 0.6249928572465263 | 0.2826743904387342 |

|                    |                    |                    |
|--------------------|--------------------|--------------------|
| 0.1405591795997333 | 0.0000000000000000 | 0.2217700856756741 |
| 0.1404691619055531 | 0.5000000421003676 | 0.2217669316843430 |
| 0.1405551011689018 | 0.2500072438365546 | 0.2217876358327373 |
| 0.1405551011689018 | 0.7499928403641827 | 0.2217876358327373 |
| 0.8149166527018391 | 0.2500121586956220 | 0.2184181963903264 |
| 0.8149166527018391 | 0.7499878413043767 | 0.2184181963903264 |
| 0.8148404001513169 | 0.5000000421003676 | 0.2183887465848716 |
| 0.8149082533754076 | 0.0000000000000000 | 0.2184118019970973 |
| 0.4692868308049363 | 0.0000000000000000 | 0.9644105747472734 |
| 0.1493135845685498 | 0.0000000000000000 | 0.9620017016853076 |
| 0.9735609239991798 | 0.3749856792146760 | 0.1575489467251884 |
| 0.9735609239991798 | 0.6250144049860623 | 0.1575489467251884 |
| 0.9735860010469249 | 0.1250137492086325 | 0.1575659957652696 |
| 0.9735860010469249 | 0.8749863349921061 | 0.1575659957652696 |
| 0.6479703027729856 | 0.1250092463096784 | 0.1541246288349799 |
| 0.6479703027729856 | 0.8749908378910555 | 0.1541246288349799 |
| 0.6479342000560976 | 0.3749790436093728 | 0.1541138786730077 |
| 0.6479342000560976 | 0.6250210405913652 | 0.1541138786730077 |
| 0.8069976581044283 | 0.0000000000000000 | 0.0933163030200940 |
| 0.8069852904601778 | 0.5000000421003676 | 0.0933046673042923 |
| 0.8069655685818095 | 0.7500085465509481 | 0.0932944760403975 |
| 0.8069655685818095 | 0.2499915376497878 | 0.0932944760403975 |
| 0.4818297871066847 | 0.7500105371066186 | 0.0898994034016678 |
| 0.4818297871066847 | 0.2499895470941198 | 0.0898994034016678 |
| 0.4818579919499578 | 0.5000000421003676 | 0.0899082688437710 |
| 0.4818560805725787 | 0.0000000000000000 | 0.0899142746480577 |
| 0.6403842823499730 | 0.6249976515972234 | 0.0287244409559266 |
| 0.6403842823499730 | 0.3750023484027769 | 0.0287244409559266 |
| 0.6403830711156362 | 0.8750120196116512 | 0.0287272676289542 |
| 0.6403830711156362 | 0.1249879803883489 | 0.0287272676289542 |
| 0.3152349062445852 | 0.6249955735696537 | 0.0262882789083582 |
| 0.3152349062445852 | 0.3750045106310838 | 0.0262882789083582 |
| 0.3152243608335705 | 0.8750125339056082 | 0.0262863331439801 |
| 0.3152243608335705 | 0.1249874660943914 | 0.0262863331439801 |
| 0.4692871742975160 | 0.5000000421003676 | 0.9644103570347038 |
| 0.4692945158321162 | 0.7500059039515007 | 0.9644171080367213 |
| 0.4692945158321162 | 0.2499940960485009 | 0.9644171080367213 |
| 0.1493217007655067 | 0.7499997719970363 | 0.9620071745100125 |
| 0.1493217007655067 | 0.2500002280029626 | 0.9620071745100125 |
| 0.1493195729817717 | 0.5000000421003676 | 0.9620097549634548 |
| 0.6433379001450539 | 0.8750008755438754 | 0.4137318536647316 |
| 0.6433379001450539 | 0.1249991244561275 | 0.4137318536647316 |
| 0.6433344137929894 | 0.6249994712211570 | 0.4137274101905338 |
| 0.6433344137929894 | 0.3750005287788422 | 0.4137274101905338 |
| 0.3234076015303908 | 0.6250101094225929 | 0.4114370592758472 |
| 0.3234076015303908 | 0.3749899747781379 | 0.4114370592758472 |
| 0.3234115034051257 | 0.1250052898222773 | 0.4114391055804729 |
| 0.3234115034051257 | 0.8749947101777201 | 0.4114391055804729 |
| 0.9741962149102958 | 0.8750045044176704 | 0.8996807609643032 |
| 0.9741962149102958 | 0.1249954955823247 | 0.8996807609643032 |
| 0.6476918238688473 | 0.8750068382993799 | 0.9010071067286278 |

|                    |                    |                     |
|--------------------|--------------------|---------------------|
| 0.6476918238688473 | 0.1249931617006174 | 0.9010071067286278  |
| 0.8123947374903293 | 0.0000000000000000 | 0.8393625421386524  |
| 0.8124016783832584 | 0.7500075645680151 | 0.8393659351408506  |
| 0.8124016783832584 | 0.2499924354319868 | 0.8393659351408506  |
| 0.4815138347360163 | 0.7500105457523483 | 0.8400559545949104  |
| 0.4815138347360163 | 0.2499894542476542 | 0.8400559545949104  |
| 0.4815159786394300 | 0.0000000000000000 | 0.8400537315202358  |
| 0.6483857246124786 | 0.1249883042530331 | 0.7788215585969804  |
| 0.6483857246124786 | 0.8750117799477047 | 0.7788215585969804  |
| 0.6483894253620038 | 0.3749898534089147 | 0.7788192494802650  |
| 0.6483894253620038 | 0.6250102307918262 | 0.7788192494802650  |
| 0.3154239402417181 | 0.1249982540767916 | 0.7792173784181233  |
| 0.3154239402417181 | 0.8750018301239425 | 0.7792173784181233  |
| 0.3154147637231115 | 0.3749970481835051 | 0.7792179958554469  |
| 0.3154147637231115 | 0.6250030360172245 | 0.7792179958554469  |
| 0.4832408506328128 | 0.0000000000000000 | 0.7182597546660371  |
| 0.4832203726353707 | 0.5000000421003676 | 0.7182558398591118  |
| 0.4832277683007807 | 0.2499787057312993 | 0.7182597520218801  |
| 0.4832277683007807 | 0.7500213784694334 | 0.7182597520218801  |
| 0.1503330242895301 | 0.2499874216952338 | 0.7183247303279729  |
| 0.1503330242895301 | 0.7500125783047671 | 0.7183247303279729  |
| 0.1503331397849368 | 0.5000000421003676 | 0.7183214593168581  |
| 0.1503275716863084 | 0.0000000000000000 | 0.7183276877213790  |
| 0.3176334296162104 | 0.3749852549404777 | 0.6574799831549846  |
| 0.3176334296162104 | 0.6250148292602573 | 0.6574799831549846  |
| 0.3176368439597327 | 0.8750118171040049 | 0.6574836635202529  |
| 0.3176368439597327 | 0.1249882670967302 | 0.6574836635202529  |
| 0.9842935278110009 | 0.8750202934285093 | 0.6575674088893106  |
| 0.9842935278110009 | 0.1249797907722264 | 0.6575674088893106  |
| 0.9843018082550880 | 0.3749720655037161 | 0.6575633972681890  |
| 0.9843018082550880 | 0.6250280186970162 | 0.6575633972681890  |
| 0.1510211795085310 | 0.0000000000000000 | 0.5969334953720891  |
| 0.1510216671815429 | 0.5000000421003676 | 0.5969322362037791  |
| 0.1510605415960750 | 0.2499789766985768 | 0.5969305646253934  |
| 0.1510605415960750 | 0.7500211075021570 | 0.5969305646253934  |
| 0.8176115642320609 | 0.7500273001903912 | 0.5968956868527880  |
| 0.8176115642320609 | 0.2499727840103405 | 0.5968956868527880  |
| 0.8175729596999637 | 0.5000000421003676 | 0.5968984499166667  |
| 0.8175746341277088 | 0.0000000000000000 | 0.5968982453498587  |
| 0.9845417555159628 | 0.6250069300789716 | 0.5364134353084591  |
| 0.9845417555159628 | 0.3749930699210249 | 0.5364134353084591  |
| 0.9845368343739349 | 0.8750116823808908 | 0.5364137051062093  |
| 0.9845368343739349 | 0.1249883176191064 | 0.5364137051062093  |
| 0.6509606642093160 | 0.6250077258229790 | 0.5359129237388315  |
| 0.6509606642093160 | 0.3749923583777550 | 0.5359129237388315  |
| 0.6509603536759775 | 0.8750114322732883 | 0.5359122021120676  |
| 0.6509603536759775 | 0.1249885677267089 | 0.5359122021120676  |
| 0.8202962843054337 | 0.5000000421003676 | 0.4761054210364303  |
| 0.8202933281994846 | 0.0000000000000000 | 0.4761074708764138  |
| 0.8202969047846481 | 0.7500074195855267 | 0.47610592444460924 |
| 0.8202969047846481 | 0.2499925804144773 | 0.47610592444460924 |

|                    |                    |                    |
|--------------------|--------------------|--------------------|
| 0.4806657434107224 | 0.7499958649504359 | 0.4760014204190151 |
| 0.4806657434107224 | 0.2500041350495634 | 0.4760014204190151 |
| 0.4806255940240536 | 0.0000000000000000 | 0.4759980248192536 |
| 0.4806642951519571 | 0.5000000421003676 | 0.4759928682265541 |
| 0.9742077434487320 | 0.6250039548309609 | 0.8996869712610233 |
| 0.9742077434487320 | 0.3749960451690390 | 0.8996869712610233 |
| 0.6476937143221203 | 0.6250069263063500 | 0.9010085522338610 |
| 0.6476937143221203 | 0.3749931578943880 | 0.9010085522338610 |
| 0.8124049686288852 | 0.5000000421003676 | 0.8393664444371284 |
| 0.4815068504414693 | 0.5000000421003676 | 0.8400562328731674 |
| 0.3138620950974336 | 0.6250077387806708 | 0.8998075812964242 |
| 0.3138620950974336 | 0.3749922612193293 | 0.8998075812964242 |
| 0.3138594167157119 | 0.8750022830271608 | 0.8998040076556938 |
| 0.3138594167157119 | 0.1249978011735736 | 0.8998040076556938 |
| 0.1458955445258084 | 0.0000000000000000 | 0.8398813880702628 |
| 0.1459050189998166 | 0.5000000421003676 | 0.8398898718839813 |
| 0.1459061372190041 | 0.2499970373629609 | 0.8398856027880864 |
| 0.1459061372190041 | 0.7500029626370414 | 0.8398856027880864 |
| 0.9817922073014277 | 0.8750049048071363 | 0.7788623669495347 |
| 0.9817922073014277 | 0.1249950951928656 | 0.7788623669495347 |
| 0.9818063084814440 | 0.3749935147395286 | 0.7788616700982480 |
| 0.9818063084814440 | 0.6250064852604731 | 0.7788616700982480 |
| 0.8166295261063875 | 0.0000000000000000 | 0.7181570925376545 |
| 0.8166383190549399 | 0.7500311553200252 | 0.7181573019669006 |
| 0.8166383190549399 | 0.2499688446799775 | 0.7181573019669006 |
| 0.8166450364369851 | 0.5000000421003676 | 0.7181508648147440 |
| 0.6505745277705269 | 0.8750179272964599 | 0.6574207554608098 |
| 0.6505745277705269 | 0.1249820727035397 | 0.6574207554608098 |
| 0.6505678203511603 | 0.3749728391112150 | 0.6574207216664905 |
| 0.6505678203511603 | 0.6250271608887866 | 0.6574207216664905 |
| 0.4839555628962106 | 0.5000000421003676 | 0.5965658549294972 |
| 0.4839625097929876 | 0.0000000000000000 | 0.5965662623820921 |
| 0.4839873968420565 | 0.7500179007538947 | 0.5965633633443176 |
| 0.4839873968420565 | 0.2499820992461058 | 0.5965633633443176 |
| 0.3154645433606211 | 0.3749993420330809 | 0.5357521195513993 |
| 0.3154645433606211 | 0.6250006579669181 | 0.5357521195513993 |
| 0.3154596079972494 | 0.1249906246733478 | 0.5357525708751265 |
| 0.3154596079972494 | 0.8750094595273854 | 0.5357525708751265 |
| 0.1468408235764356 | 0.5000000421003676 | 0.4748358817655814 |
| 0.1468382461244159 | 0.2499923378066217 | 0.4748408309624428 |
| 0.1468382461244159 | 0.7500076621933794 | 0.4748408309624428 |
| 0.1468190839333930 | 0.0000000000000000 | 0.4748360944657120 |
| 0.9797175790878688 | 0.3749907696843965 | 0.4124928783372397 |
| 0.9797175790878688 | 0.6250092303156037 | 0.4124928783372397 |
| 0.9797289933820599 | 0.8749995887742932 | 0.4124887939173983 |
| 0.9797289933820599 | 0.1250004954264433 | 0.4124887939173983 |
| 0.8131507415013836 | 0.0000000000000000 | 0.3477932036370116 |
| 0.8131287260737060 | 0.5000000421003676 | 0.3477906789947769 |
| 0.8131289179602977 | 0.7499923492418067 | 0.3477892792365567 |
| 0.8131289179602977 | 0.2500076507581919 | 0.3477892792365567 |
| 0.6448397498951253 | 0.8750016780375127 | 0.2837806588334132 |

|                    |                    |                    |
|--------------------|--------------------|--------------------|
| 0.6448397498951253 | 0.1249983219624908 | 0.2837806588334132 |
| 0.6448240403424915 | 0.6249923068638499 | 0.2837785710993197 |
| 0.6448240403424915 | 0.3750076931361500 | 0.2837785710993197 |
| 0.4774099220480117 | 0.0000000000000000 | 0.2199144088765154 |
| 0.4773999833048436 | 0.7499952741852016 | 0.2199171599975691 |
| 0.4773999833048436 | 0.2500047258147972 | 0.2199171599975691 |
| 0.4773487212254940 | 0.5000000421003676 | 0.2199074939062580 |
| 0.8129240174457384 | 0.5000000421003676 | 0.9633699301173643 |
| 0.8129175118285941 | 0.2499951260663077 | 0.9633701368565595 |
| 0.8129175118285941 | 0.7500048739336910 | 0.9633701368565595 |
| 0.8129101869348331 | 0.0000000000000000 | 0.9633692264073528 |
| 0.3109002169854025 | 0.8749881562666900 | 0.1558883576947625 |
| 0.3109002169854025 | 0.1250118437333071 | 0.1558883576947625 |
| 0.3108793526072240 | 0.3749965416675554 | 0.1558861248025059 |
| 0.3108793526072240 | 0.6250034583324445 | 0.1558861248025059 |
| 0.1444542274227958 | 0.5000000421003676 | 0.0920372689930027 |
| 0.1444456699929749 | 0.0000000000000000 | 0.0920406625594175 |
| 0.1444366605752616 | 0.2499924486071248 | 0.0920334219656131 |
| 0.1444366605752616 | 0.7500076355936032 | 0.0920334219656131 |
| 0.9777852561028447 | 0.3749986495168205 | 0.0280399112117543 |
| 0.9777852561028447 | 0.6250013504831808 | 0.0280399112117543 |
| 0.9777875623981169 | 0.1249917013004825 | 0.0280385912640777 |
| 0.9777875623981169 | 0.8750083829002518 | 0.0280385912640777 |

V Li O F

1.0000000000000000

8.8753919999999997 0.0000000000000000 0.0000000000000000

-3.0717460000000001 16.7457710000000013 0.0000000000000000

0.0000000000000000 0.0000000000000000 24.775999999999998

V Li O F

32 160 64 128

Direct

|                    |                    |                    |
|--------------------|--------------------|--------------------|
| 0.2669721132417650 | 0.8124017857450943 | 0.8453162576037834 |
| 0.0169682490209098 | 0.0624307495761985 | 0.8453343224020898 |
| 0.5168801827790370 | 0.5623655857219587 | 0.8452934603357636 |
| 0.7669229002695540 | 0.3123927826214981 | 0.8452804939875134 |
| 0.1415638195494639 | 0.9376095644492402 | 0.7831381748756603 |
| 0.8915393959663596 | 0.1876051540621231 | 0.7830768092992035 |
| 0.3915276530193326 | 0.6875683170547781 | 0.7831146899991663 |
| 0.6415093892323501 | 0.4375811030803827 | 0.7830718051633420 |
| 0.7659360503660473 | 0.3130041484762124 | 0.7183096600653996 |
| 0.5159621013090423 | 0.5629859721440165 | 0.7183476354211262 |
| 0.0159929966910477 | 0.0629888360990669 | 0.7183894174296830 |
| 0.2659920721962587 | 0.8130020947650997 | 0.7183855599297925 |
| 0.8870164242358179 | 0.1883261496749849 | 0.6596666880814842 |
| 0.6369901564286365 | 0.4383422901860786 | 0.6596411287590893 |
| 0.1370800895177670 | 0.9383451809654866 | 0.6597165728412487 |
| 0.3870332815636976 | 0.6883415184150699 | 0.6596920541406968 |
| 0.2620895491663059 | 0.8133028325526339 | 0.0945874033041497 |
| 0.0121645947715161 | 0.0633407984817397 | 0.0946334213926199 |
| 0.5119872364532593 | 0.5632787377032484 | 0.0946026788620242 |

|                    |                    |                    |
|--------------------|--------------------|--------------------|
| 0.7620613098825482 | 0.3133193858476873 | 0.0945915864790385 |
| 0.1410647476639533 | 0.9379761534528477 | 0.0359211516126032 |
| 0.8910875058577035 | 0.1879852947269637 | 0.0359266139791202 |
| 0.3910093770033775 | 0.6879498180246626 | 0.0359232926272571 |
| 0.6410064905025161 | 0.4379536965331060 | 0.0359180457052263 |
| 0.7665527879795221 | 0.3125551264257843 | 0.9711743421241092 |
| 0.5164891223348268 | 0.5625131419682132 | 0.9711870971058049 |
| 0.0165967278846340 | 0.0626147784280381 | 0.9712193629766969 |
| 0.2665708919814102 | 0.8125562133552732 | 0.9711835555960774 |
| 0.8919899992170517 | 0.1874027723464139 | 0.9089791877634232 |
| 0.6419128931866497 | 0.4373600545623963 | 0.9089706901403045 |
| 0.1419931574453016 | 0.9374047212974778 | 0.9090031200895723 |
| 0.3919532420942381 | 0.6873481555611433 | 0.9089914000498889 |
| 0.1766682696120734 | 0.5619111420750981 | 0.8449839141475827 |
| 0.6767783572985098 | 0.0620249580178607 | 0.8449408938400073 |
| 0.9267903875200324 | 0.8119331162118356 | 0.8450238148125916 |
| 0.4266514331202131 | 0.3119746619152539 | 0.8449723048569027 |
| 0.6045996132927051 | 0.8132945982232145 | 0.8457981777743737 |
| 0.1044478496687896 | 0.3133405320956328 | 0.8457598664196101 |
| 0.3545781090436353 | 0.0633520685683531 | 0.8457991372192081 |
| 0.8544249351509798 | 0.5632621245793380 | 0.8457188992664931 |
| 0.3016753108833081 | 0.4361803434817933 | 0.7840095402506134 |
| 0.2292485426545330 | 0.1890042045897957 | 0.7831875924903556 |
| 0.4793295892960017 | 0.9389720432258666 | 0.7831679936344137 |
| 0.5516993486368674 | 0.1862545294360957 | 0.7839604023370624 |
| 0.8017346412527876 | 0.9362134166470394 | 0.7840573937936535 |
| 0.7292857482285222 | 0.6889170082282090 | 0.7831475537358589 |
| 0.0517055067588510 | 0.6862012396731626 | 0.7840410030334753 |
| 0.9792345629426438 | 0.4389555045037666 | 0.7830963360989533 |
| 0.8491133066626653 | 0.5616886617077608 | 0.7192415847707707 |
| 0.3492159984075126 | 0.0617225103524389 | 0.7193472682411489 |
| 0.0990929066937886 | 0.3117302236428175 | 0.7192681497591836 |
| 0.5991791812466026 | 0.8117120806412059 | 0.7193405486958261 |
| 0.4278720460130111 | 0.3134771387565921 | 0.7193079570139878 |
| 0.9280241599950730 | 0.8134611792714186 | 0.7193978689152873 |
| 0.6779266967759289 | 0.0634582633788635 | 0.7193209844029519 |
| 0.1778986303848613 | 0.5634733272587810 | 0.7193359084889724 |
| 0.9803324354814361 | 0.4350812775028717 | 0.6612304977097399 |
| 0.0490494765400774 | 0.6901802051004516 | 0.6609370401276112 |
| 0.7991180680201206 | 0.9401185593542860 | 0.6609643759447468 |
| 0.2303131830835830 | 0.1850815943015976 | 0.6613166727434708 |
| 0.7303705004026336 | 0.6850975472904939 | 0.6612577452327579 |
| 0.2989748327352865 | 0.4401932324159449 | 0.6609135002761102 |
| 0.5490187850025456 | 0.1901605202760038 | 0.6608728575372883 |
| 0.4804020553189365 | 0.9350639669252596 | 0.6612854544944641 |
| 0.1740234583351920 | 0.5650230915436025 | 0.0932315325309549 |
| 0.6741893019265168 | 0.0650001094115695 | 0.0931392944857439 |
| 0.9241849623643648 | 0.8150011291834480 | 0.0931761219073684 |
| 0.4241232281501342 | 0.3150725364952826 | 0.0932539246991933 |
| 0.6054558302201474 | 0.8100368091088415 | 0.0928358703911616 |
| 0.1054250633316709 | 0.3100623982587175 | 0.0929643010453671 |

|                    |                    |                    |
|--------------------|--------------------|--------------------|
| 0.3554768418180512 | 0.0600697643066847 | 0.0928600820579523 |
| 0.8552752518026185 | 0.5600451460546328 | 0.0928442516533306 |
| 0.3029215701244224 | 0.4384096386198496 | 0.0349374668519752 |
| 0.2242154371610978 | 0.1867220635038698 | 0.0350087499403973 |
| 0.4742559581827427 | 0.9366569974836385 | 0.0348697111441609 |
| 0.5531228650463490 | 0.1884362707678752 | 0.0348410518129120 |
| 0.8032451715094724 | 0.9384256765892812 | 0.0348065114108919 |
| 0.7240795746430154 | 0.6866126552847002 | 0.0348952665025882 |
| 0.0530942488376140 | 0.6884152970441697 | 0.0348074767908843 |
| 0.9740194541939309 | 0.4366987794214198 | 0.0348884767994363 |
| 0.8542903044616351 | 0.5639015662931486 | 0.9709226611026565 |
| 0.3543397765885907 | 0.0640331423844408 | 0.9710397773921592 |
| 0.1043045747269601 | 0.3139742885641791 | 0.9710430044064865 |
| 0.6043628394864706 | 0.8139323265371642 | 0.9709684339633966 |
| 0.4267419212232644 | 0.3111798920271943 | 0.9701373902696276 |
| 0.9268053534606736 | 0.8111546905542845 | 0.9700872129744725 |
| 0.6767730205957059 | 0.0612471890924488 | 0.9700137136770041 |
| 0.1767222107459138 | 0.5611165310701052 | 0.9701257543557436 |
| 0.9794545819284206 | 0.4382488402403249 | 0.9083900073930871 |
| 0.0517431571325534 | 0.6869007422186771 | 0.9091551379554124 |
| 0.8017803428570248 | 0.9370096984232963 | 0.9091940446948082 |
| 0.2294974171765367 | 0.1883582739605328 | 0.9084767289185522 |
| 0.7295544233700006 | 0.6882337890887215 | 0.9084202203474799 |
| 0.3016128713415876 | 0.4369489255006888 | 0.9092083149740718 |
| 0.5516192201107810 | 0.1870118125479528 | 0.9091351433574236 |
| 0.4796295289321921 | 0.9383151399488621 | 0.9084176488917586 |
| 0.2653822217155452 | 0.8131651682744303 | 0.3474557385771422 |
| 0.0153502414693531 | 0.0630982960146826 | 0.3474481184520620 |
| 0.5153632090808156 | 0.5631893147194429 | 0.3474672370351559 |
| 0.7653356544850649 | 0.3131267832025857 | 0.3474198881110560 |
| 0.1400985816342235 | 0.9381312418410082 | 0.2831192693409262 |
| 0.8901870987223917 | 0.1881659920066189 | 0.2831458405454508 |
| 0.3902530405018435 | 0.6881992968980698 | 0.2831059687238975 |
| 0.6403426065047516 | 0.4382392134671415 | 0.2831317081150876 |
| 0.7644633594116403 | 0.3128788842479270 | 0.2263303560693297 |
| 0.5144997769455587 | 0.5629139673855823 | 0.2263577652336019 |
| 0.0144165990596121 | 0.0628682400051635 | 0.2263515404523843 |
| 0.2645135620869440 | 0.8129046440819084 | 0.2263355570588406 |
| 0.8923279247892041 | 0.1881222928145123 | 0.1577234067350444 |
| 0.6421379604006904 | 0.4380993170897636 | 0.1576926469020845 |
| 0.1423791839446680 | 0.9381239939628522 | 0.1577011841600317 |
| 0.3921379930398214 | 0.6880965788393273 | 0.1577052665982022 |
| 0.1824394195563921 | 0.5628833772724785 | 0.3467574316120028 |
| 0.6824807124425211 | 0.0627549651247723 | 0.3467149530923307 |
| 0.9325106072859172 | 0.8128263861810154 | 0.3467488259726255 |
| 0.4323673005539185 | 0.3128134144215470 | 0.3467616631217841 |
| 0.5987256100338310 | 0.8132443378740173 | 0.3470998380254047 |
| 0.0987272852140622 | 0.3132659140421247 | 0.3471834095932384 |
| 0.3487422246380880 | 0.0631854221274910 | 0.3471254377905373 |
| 0.8486780915935065 | 0.5633054435573911 | 0.3471290638295519 |
| 0.3075185894819035 | 0.4377986492831501 | 0.2833265203421166 |

|                    |                    |                    |
|--------------------|--------------------|--------------------|
| 0.2236369867595479 | 0.1881915826319767 | 0.2830557433771512 |
| 0.4736846762814476 | 0.9382296288465631 | 0.2829556109166239 |
| 0.5574099826751779 | 0.1877069456780134 | 0.2832124809272070 |
| 0.8073856038049082 | 0.9377046409056916 | 0.2832284979159357 |
| 0.7237813565670661 | 0.6882837356190741 | 0.2829744663052621 |
| 0.0574771932853990 | 0.6877736040832063 | 0.2832619240190727 |
| 0.9737280458198926 | 0.4382645892073216 | 0.2830011205553656 |
| 0.8527130213110015 | 0.5641264237148517 | 0.2241540873155570 |
| 0.3525930494535262 | 0.0640430071472176 | 0.2241295195307721 |
| 0.1027139524091248 | 0.3140908301524555 | 0.2242371883534618 |
| 0.6026214451080834 | 0.8140876663547556 | 0.2240981316086414 |
| 0.4305116028169142 | 0.3120447590510982 | 0.2229376145196768 |
| 0.9304936084431008 | 0.8119961515693106 | 0.2228658046160324 |
| 0.6804996785453642 | 0.0619916490673295 | 0.2228409519550666 |
| 0.1805460574545685 | 0.5620476110734731 | 0.2228982262693297 |
| 0.9714539149162487 | 0.4425522664306420 | 0.1555572250438861 |
| 0.0587696393116381 | 0.6836125973867042 | 0.1561654444578839 |
| 0.8091214693368743 | 0.9335880576562995 | 0.1561672732445301 |
| 0.2217951953094149 | 0.1925474994323113 | 0.1556340551659097 |
| 0.7215312231224051 | 0.6925084579429741 | 0.1555188041424623 |
| 0.3086856967918533 | 0.4336001791869852 | 0.1562978828962924 |
| 0.5590304771396257 | 0.1835725589057297 | 0.1561614471292083 |
| 0.4718394834053630 | 0.9425577183071684 | 0.1554891430246083 |
| 0.2672007408125263 | 0.8131945491089146 | 0.5965752812144494 |
| 0.0171872669117044 | 0.0631338045703538 | 0.5965696155747839 |
| 0.5170405011902803 | 0.5631931830844698 | 0.5965121689785157 |
| 0.7670113585917828 | 0.3131252803326889 | 0.5964962148006564 |
| 0.1393352144731409 | 0.9379561652036054 | 0.5280073943389041 |
| 0.8892923732668072 | 0.1878800908233708 | 0.5279617764938783 |
| 0.3893968496171092 | 0.6880023222159762 | 0.5279862006744497 |
| 0.6393762444192959 | 0.4379192465173706 | 0.5279437050002905 |
| 0.7650981802281372 | 0.3131891074663072 | 0.4711016766872944 |
| 0.5151402455913974 | 0.5632705595467424 | 0.4711440878470555 |
| 0.0150052941682989 | 0.0631377273530575 | 0.4711599940993415 |
| 0.2650360209432239 | 0.8132228926127992 | 0.4711741472448520 |
| 0.8902766928715461 | 0.1881156567075697 | 0.4068435084050103 |
| 0.6402646822640238 | 0.4381681775658826 | 0.4068295153548091 |
| 0.1403174019296481 | 0.9381466104104583 | 0.4068668974201101 |
| 0.3902902725605642 | 0.6882022068167809 | 0.4068341825681733 |
| 0.1834632083140351 | 0.5587288999464189 | 0.5979865554810450 |
| 0.6837099275852941 | 0.0586512267947956 | 0.5979683638153351 |
| 0.9337480415884580 | 0.8087218757584812 | 0.5980238135328306 |
| 0.4334423776153717 | 0.3086662827396581 | 0.5979334693407906 |
| 0.5965498972714985 | 0.8175824430801087 | 0.5986749385186293 |
| 0.0963467656904732 | 0.3175768939938707 | 0.5986111080314195 |
| 0.3465072669492241 | 0.0675542677596878 | 0.5986846195177818 |
| 0.8463440252505897 | 0.5675921657022754 | 0.5985896776702895 |
| 0.3052470498804561 | 0.4371282017987457 | 0.5313703036325818 |
| 0.2273417181570180 | 0.1890635119659392 | 0.5301237712493506 |
| 0.4773707872013032 | 0.9391367460771355 | 0.5300974814447553 |
| 0.5551651571630841 | 0.1870489194221304 | 0.5313116666571533 |

|                    |                    |                    |
|--------------------|--------------------|--------------------|
| 0.8051574253383131 | 0.9370742151854162 | 0.5313461741308122 |
| 0.7273908578384561 | 0.6892022200010429 | 0.5300848222743861 |
| 0.0551911877870571 | 0.6871311993810614 | 0.5313609705507817 |
| 0.9774238543874267 | 0.4391580261791804 | 0.5300459929642756 |
| 0.8487056707148668 | 0.5633313145989089 | 0.4712180429390894 |
| 0.3486306526935279 | 0.0632186500646928 | 0.4712249848468097 |
| 0.0986841039502261 | 0.3132509788783182 | 0.4712482449214773 |
| 0.5986596382254702 | 0.8133053645403965 | 0.4712158968259286 |
| 0.4322826608012810 | 0.3127760314950869 | 0.4709463549884438 |
| 0.9322896874225532 | 0.8128300118353060 | 0.4709846185901567 |
| 0.6822206080358633 | 0.0627339070137155 | 0.4709507746246686 |
| 0.1823328509671572 | 0.5628501192983753 | 0.4709743841528483 |
| 0.9736296342643213 | 0.4382735828240328 | 0.4071115022336458 |
| 0.0574209868859715 | 0.6878973393603010 | 0.4075438962593267 |
| 0.8073882934796855 | 0.9378112624080708 | 0.4074891668837411 |
| 0.2236241310669345 | 0.1881642894085835 | 0.4071506451393507 |
| 0.7236449967320657 | 0.6882985838113478 | 0.4071204116781368 |
| 0.3073990778333284 | 0.4379127728240272 | 0.4075573970575004 |
| 0.5573386460404249 | 0.1877983092635924 | 0.4074603828950867 |
| 0.4736486646218620 | 0.9382005579414420 | 0.4071025131121246 |
| 0.0485167258865674 | 0.1842444315091212 | 0.8476790337084273 |
| 0.5485033650762641 | 0.6841762327400174 | 0.8476970050549438 |
| 0.7984989901795078 | 0.4341972283534556 | 0.8476684600454054 |
| 0.2985397037909133 | 0.9342248124468800 | 0.8476980396679029 |
| 0.7351173691229127 | 0.1904423597852128 | 0.8439792346799724 |
| 0.2351106802986016 | 0.6904135176418508 | 0.8440183120498933 |
| 0.9851105872805396 | 0.9404630447403035 | 0.8440464566352490 |
| 0.4851039841532996 | 0.4404132086641790 | 0.8439732991446613 |
| 0.6725955750682053 | 0.5588960244310576 | 0.7808701654851936 |
| 0.3610028598191293 | 0.5659943252597263 | 0.7839264681468988 |
| 0.1110488991430930 | 0.8160255322307340 | 0.7839527219558112 |
| 0.1726410038506653 | 0.0589481678109340 | 0.7809306643298320 |
| 0.8610684474020026 | 0.0660177937008772 | 0.7839483939161027 |
| 0.9225745674724340 | 0.3089278413555581 | 0.7808450762127757 |
| 0.6110398718042160 | 0.3160033814434118 | 0.7839007346339191 |
| 0.4226060852560058 | 0.8089150649561558 | 0.7809092983140691 |
| 0.4816930471331266 | 0.4398053472716904 | 0.7182275368463940 |
| 0.9817471974159088 | 0.9398061012053078 | 0.7182931948716476 |
| 0.2317492085799054 | 0.6898006273679994 | 0.7182559065383211 |
| 0.7317180722722600 | 0.1898089558325142 | 0.7182198721242448 |
| 0.2979067989682518 | 0.9358931543168615 | 0.7212533311268525 |
| 0.7978568098168078 | 0.4358827678654899 | 0.7211912265477488 |
| 0.5479068446002411 | 0.6858590817895958 | 0.7212471316309007 |
| 0.0479133095479785 | 0.1858742647573451 | 0.7212209831173030 |
| 0.4276416434322873 | 0.8084181776059671 | 0.6585628391230687 |
| 0.3564761716585449 | 0.5687134951887809 | 0.6597093892873735 |
| 0.6775893479576552 | 0.5584052242094393 | 0.6584928642226016 |
| 0.1064860106002139 | 0.8187089147649573 | 0.6597455327193759 |
| 0.6064707042170316 | 0.3187199900702143 | 0.6596694381146304 |
| 0.1776395932338364 | 0.0583871635881204 | 0.6585569095863038 |
| 0.8565360469819641 | 0.0687038169199634 | 0.6597248096782938 |

|                    |                    |                    |
|--------------------|--------------------|--------------------|
| 0.9276220159395635 | 0.3084026603487996 | 0.6584920024519205 |
| 0.0527524046781623 | 0.1833982429126295 | 0.0957938742109310 |
| 0.5526343198610786 | 0.6833619003153935 | 0.0957240067587344 |
| 0.8026824742396427 | 0.4333884746874531 | 0.0957475368362431 |
| 0.3026745364921307 | 0.9333711696655530 | 0.0957151619168506 |
| 0.7316016250352476 | 0.1936946451529937 | 0.0945638199783700 |
| 0.2315040060383296 | 0.6936593802814321 | 0.0945470562035989 |
| 0.9815506898471237 | 0.9436943013036194 | 0.0945640798322296 |
| 0.4815665366231033 | 0.4436554320665837 | 0.0945875937537632 |
| 0.6728752753826663 | 0.5608209037831996 | 0.0330511197469349 |
| 0.3567446508306227 | 0.5647119805873654 | 0.0360397218179050 |
| 0.1067565589288330 | 0.8147591983084208 | 0.0360187856300807 |
| 0.1729740095739798 | 0.0609012311224136 | 0.0330851713374174 |
| 0.8568126715840102 | 0.0648258566377886 | 0.0360564503683172 |
| 0.9229387188651165 | 0.3108546722738654 | 0.0330477103279892 |
| 0.6067783859391399 | 0.3147725455681504 | 0.0360298628029497 |
| 0.4229072919333232 | 0.8108693740387930 | 0.0330542380405631 |
| 0.4860757322924695 | 0.4409295238861990 | 0.9703518320603424 |
| 0.9860873069905903 | 0.9410050841608533 | 0.9703893291359562 |
| 0.2360673632118256 | 0.6909552808874715 | 0.9703790303112503 |
| 0.7361113236035570 | 0.1909756042896449 | 0.9703441097589030 |
| 0.2976572098693306 | 0.9338857489995918 | 0.9733835485032168 |
| 0.7976394619287274 | 0.4338756143183606 | 0.9733942445688846 |
| 0.5476274058047239 | 0.6838377311383503 | 0.9734065294829596 |
| 0.0477254243382288 | 0.1839284926636267 | 0.9734073082586919 |
| 0.4235418791626858 | 0.8091641172102628 | 0.9066134409884018 |
| 0.3600617253114026 | 0.5653815729958046 | 0.9102902375282038 |
| 0.6734634141335561 | 0.5591537282722929 | 0.9065843667573773 |
| 0.1101133579284177 | 0.8154323854844421 | 0.9102729024151892 |
| 0.6101353972615013 | 0.3154153633475402 | 0.9102828407822635 |
| 0.1735215705150555 | 0.0592415279350125 | 0.9066469775865805 |
| 0.8601419614280154 | 0.0654617840675781 | 0.9103074171837788 |
| 0.9234950840286116 | 0.3092151963955477 | 0.9065856238919180 |
| 0.8916906443792301 | 0.6878863102073911 | 0.8454280544021808 |
| 0.6417350273117834 | 0.9379533728145333 | 0.8454670358656182 |
| 0.3917344405163566 | 0.1879664250039540 | 0.8454707355648263 |
| 0.1417016360566936 | 0.4378996291187560 | 0.8454544467099884 |
| 0.2665037757038511 | 0.3128146729424401 | 0.7836762121581459 |
| 0.5165234549034116 | 0.0628170917840798 | 0.7836467082207290 |
| 0.7665273966812327 | 0.8127923477226312 | 0.7837240160422763 |
| 0.0165028182846972 | 0.5627749168618691 | 0.7836843978291296 |
| 0.1410369245094719 | 0.4385785502544058 | 0.7201741115435385 |
| 0.3911162283040705 | 0.1885835772392475 | 0.7201899231189637 |
| 0.6411105557454136 | 0.9385790433014288 | 0.7201993818497376 |
| 0.8910640271725789 | 0.6885750766731901 | 0.7201936212515302 |
| 0.7657383932039818 | 0.8125587042278477 | 0.6567977287849173 |
| 0.0157072535222805 | 0.5625499818094259 | 0.6567775189389059 |
| 0.5157513697207994 | 0.0625316234358729 | 0.6567531911348136 |
| 0.2657078512372556 | 0.3125080781876344 | 0.6567534203298151 |
| 0.8908061613368499 | 0.6875074503985136 | 0.0974002248711947 |
| 0.6408655666878511 | 0.9375498176786664 | 0.0974201075287534 |

|                    |                    |                    |
|--------------------|--------------------|--------------------|
| 0.3909432985495483 | 0.1875235820306126 | 0.0974739925160305 |
| 0.1408968213019820 | 0.4374903184207161 | 0.0974826970925155 |
| 0.2660646877436039 | 0.3135634994597498 | 0.0340957310058405 |
| 0.5161013998320106 | 0.0635877134398428 | 0.0340366440523685 |
| 0.7660632168570191 | 0.8135611727108344 | 0.0340465793965952 |
| 0.0160340065432152 | 0.5635011417888420 | 0.0340418884908248 |
| 0.1415801073061120 | 0.4377632757928318 | 0.9705167384231246 |
| 0.3916506679083680 | 0.1878443993455585 | 0.9705216226579091 |
| 0.6415789340663359 | 0.9378446871289838 | 0.9704750724251597 |
| 0.8915632056273178 | 0.6877492159844051 | 0.9704381833796683 |
| 0.7666049797051168 | 0.8128831290043985 | 0.9087795973787857 |
| 0.0165957706700447 | 0.5628538695716121 | 0.9087629543988195 |
| 0.5166502859643000 | 0.0629282782004815 | 0.9087163563546370 |
| 0.2666246013485902 | 0.3128797872732733 | 0.9087611925117189 |
| 0.0568068785752841 | 0.1883693153660742 | 0.3467497813758601 |
| 0.5568509033169060 | 0.6884147791885721 | 0.3467289555491870 |
| 0.8068103518065660 | 0.4384269246319927 | 0.3467172804063087 |
| 0.3068180520170393 | 0.9383554250073550 | 0.3467374817794862 |
| 0.7241732435249613 | 0.1878420435493709 | 0.3465618308157155 |
| 0.2241778515478665 | 0.6879188790830590 | 0.3466131759436545 |
| 0.9741523922049661 | 0.9378332976744199 | 0.3465866367908297 |
| 0.4741805319109069 | 0.4379265448722851 | 0.3466187176171552 |
| 0.6812914048149241 | 0.5636975884976924 | 0.2837805659273940 |
| 0.3493854331313583 | 0.5626361665840244 | 0.2840272246055366 |
| 0.0992533952003996 | 0.8125905503904302 | 0.2839881493006501 |
| 0.1810936737474997 | 0.0636318395593884 | 0.2838099230929094 |
| 0.8492293759621345 | 0.0625583216266276 | 0.2840134957167227 |
| 0.9312176342469801 | 0.3136905859122938 | 0.2838139620640695 |
| 0.5993428676028382 | 0.3125839611636944 | 0.2839972561366922 |
| 0.4311788001783510 | 0.8136475886106066 | 0.2837577006430732 |
| 0.4742695843531315 | 0.4372635870120500 | 0.2235714558317641 |
| 0.9741752196701026 | 0.9371975184212034 | 0.2235391270300286 |
| 0.2242990653379314 | 0.6872420268420958 | 0.2235400335371411 |
| 0.7241627543370103 | 0.1872378388069813 | 0.2235375894635733 |
| 0.3055415793269967 | 0.9394845598926548 | 0.2236543490956379 |
| 0.8057024890539117 | 0.4395179778384848 | 0.2236478545089390 |
| 0.5556315641360305 | 0.6895016723540408 | 0.2236222564326013 |
| 0.0556483794474536 | 0.1894950023149959 | 0.2237262123373293 |
| 0.4237206261741348 | 0.8146370567330193 | 0.1585950723816514 |
| 0.3511003147318189 | 0.5614808306286296 | 0.1602101958914353 |
| 0.6736828349116587 | 0.5646593604132443 | 0.1586033470927838 |
| 0.1011796330347387 | 0.8114323274192496 | 0.1601767747251782 |
| 0.6012003087179582 | 0.3115007835918578 | 0.1601888795385578 |
| 0.1737359640420123 | 0.0646087433869888 | 0.1586291658633128 |
| 0.8512521407760349 | 0.0614799818176705 | 0.1602505850875649 |
| 0.9236834581708506 | 0.3146313638318085 | 0.1586144969453409 |
| 0.8905560549496360 | 0.6880691527085417 | 0.3465406820837134 |
| 0.6405319982043467 | 0.9379959008050527 | 0.3465267267365409 |
| 0.3905096697065140 | 0.1879844274818939 | 0.3465583539422513 |
| 0.1405562036968653 | 0.4380817724769895 | 0.3465836445976669 |
| 0.2654412988542806 | 0.3130272182026437 | 0.2839297328631620 |

|                    |                    |                    |
|--------------------|--------------------|--------------------|
| 0.5153058543779645 | 0.0629648010887484 | 0.2838265117097860 |
| 0.7653625651691141 | 0.8130062328695349 | 0.2838334866836846 |
| 0.0154512061172556 | 0.5630414830241784 | 0.2838749065093977 |
| 0.1400244906396433 | 0.4375815433124745 | 0.2230223888173402 |
| 0.3897579506635735 | 0.1875547779217814 | 0.2229728215022172 |
| 0.6397482565762612 | 0.9375631854065701 | 0.2229506676772603 |
| 0.8899254602558495 | 0.6875868275995033 | 0.2229613987132776 |
| 0.7654333660078330 | 0.8131477895824775 | 0.1592790499780582 |
| 0.0153804760949812 | 0.5631689063791219 | 0.1593260255349129 |
| 0.5154385969265094 | 0.0631546914249844 | 0.1592682327270863 |
| 0.2654448198326871 | 0.3131767228368119 | 0.1593708739016554 |
| 0.0487152069874762 | 0.1896426988067358 | 0.5956367548357397 |
| 0.5487888173590880 | 0.6897254595466705 | 0.5956520621049909 |
| 0.7987174109670474 | 0.4396861494430939 | 0.5956048863027478 |
| 0.2988297772653310 | 0.9397023589730062 | 0.5956919262706124 |
| 0.7260974189204568 | 0.1864735109421803 | 0.5940979545579422 |
| 0.2261012112291506 | 0.6865192238963200 | 0.5941538974506074 |
| 0.9761856547315889 | 0.9364823888514180 | 0.5941521565812328 |
| 0.4760316144326148 | 0.4365148204679532 | 0.5940948763644017 |
| 0.6804946468175412 | 0.5645859946370639 | 0.5307100285405045 |
| 0.3490810937603387 | 0.5622937403439331 | 0.5307699621436718 |
| 0.0990280152350171 | 0.8122650154598542 | 0.5307813362112209 |
| 0.1804227634977398 | 0.0645031032329287 | 0.5307478321953525 |
| 0.8489426711829525 | 0.0622131867862209 | 0.5307677418557994 |
| 0.9304859796121605 | 0.3145420839266456 | 0.5306880377043974 |
| 0.5989902420972797 | 0.3122206757982345 | 0.5307265245429171 |
| 0.4304105950728490 | 0.8145718931838936 | 0.5307448094962284 |
| 0.4743038916794720 | 0.4376716464558999 | 0.4702778599749277 |
| 0.9742498108355621 | 0.9376438032872726 | 0.4703065442661366 |
| 0.2242756332634765 | 0.6876880728143381 | 0.4703072424476337 |
| 0.7242731311502658 | 0.1876095412182050 | 0.4702661240616768 |
| 0.3060979189911454 | 0.9386633821012250 | 0.4705627067727053 |
| 0.8061543106790490 | 0.4387002986021792 | 0.4705190714924634 |
| 0.5561760948715715 | 0.6887346219755467 | 0.4705505769946431 |
| 0.0560991568760881 | 0.1886270192893713 | 0.4705539231416365 |
| 0.4316834077450131 | 0.8134068945820303 | 0.4076031048361148 |
| 0.3490250031550436 | 0.5629662509673609 | 0.4077282519392075 |
| 0.6816952252905549 | 0.5634590589725260 | 0.4076072968723664 |
| 0.0990240712390709 | 0.8129216635886489 | 0.4077165897938803 |
| 0.5989781649482722 | 0.3128763053100218 | 0.4076942017658204 |
| 0.1816744564849994 | 0.0633527071159225 | 0.4076455829272598 |
| 0.8489941493766467 | 0.0628251266472933 | 0.4077120348074131 |
| 0.9316637596198948 | 0.3134170252745651 | 0.4076104399086990 |
| 0.8904951091339265 | 0.6882584348314696 | 0.5949461552253834 |
| 0.6404827087175945 | 0.9381861397929766 | 0.5949537689762066 |
| 0.3904275868681316 | 0.1882016154918258 | 0.5949599495939414 |
| 0.1403986718697616 | 0.4382392750077000 | 0.5949472247047706 |
| 0.2647079274725668 | 0.3126138237616837 | 0.5313419946824280 |
| 0.5146698012278328 | 0.0626000768479984 | 0.5313043223941083 |
| 0.7647226375357442 | 0.8126597982677640 | 0.5313218676163892 |
| 0.0147612574967211 | 0.5626651310859326 | 0.5313413760180362 |

|                    |                    |                    |
|--------------------|--------------------|--------------------|
| 0.1404047515382623 | 0.4380754613936139 | 0.4704562226894803 |
| 0.3903020633030773 | 0.1879824545012817 | 0.4704359124583372 |
| 0.6403154848343668 | 0.9380136969252497 | 0.4704408878588922 |
| 0.8903609159381440 | 0.6880856696566312 | 0.4704542285446538 |
| 0.7653659164414907 | 0.8130498856147675 | 0.4078002819619185 |
| 0.0153567392952140 | 0.5630932365465235 | 0.4078276596269276 |
| 0.5153757328867343 | 0.0629821310301986 | 0.4077694526959953 |
| 0.2653528341737153 | 0.3130310458585038 | 0.4078280666441857 |

INTERFACE\_111

1.0000000000000000

26.3759321148498493 0.0006772585894994 0.0004803411007946

5.9321561817725925 10.1923362140433724 0.0001609612802362

5.9321561817725907 3.3702371641142905 9.6190030140150977

| V  | Li  | O  | F  |
|----|-----|----|----|
| 32 | 112 | 64 | 80 |

Direct

|                    |                    |                    |
|--------------------|--------------------|--------------------|
| 0.0244144898194157 | 0.0634948746390511 | 0.0634948746390511 |
| 0.0244158796180989 | 0.0634951673505995 | 0.3134889376297555 |
| 0.0244157673262902 | 0.0634952831431134 | 0.5634953661717518 |
| 0.0244148102583976 | 0.0634951783741932 | 0.8134970392139382 |
| 0.0244158796180989 | 0.3134889376297555 | 0.0634951673505995 |
| 0.0244127519611997 | 0.3134935721336919 | 0.3134935721336919 |
| 0.0244126844081802 | 0.3134971661984643 | 0.5635017419594038 |
| 0.0244157912866821 | 0.3134916155707362 | 0.8134946428529144 |
| 0.0244157673262902 | 0.5634953661717518 | 0.0634952831431134 |
| 0.0244126844081802 | 0.5635017419594038 | 0.3134971661984643 |
| 0.0244156016252035 | 0.5634919559996953 | 0.5634919559996953 |
| 0.0244181287471758 | 0.5634856572417881 | 0.8134945983259060 |
| 0.0244148102583976 | 0.8134970392139382 | 0.0634951783741932 |
| 0.0244157912866821 | 0.8134946428529144 | 0.3134916155707362 |
| 0.0244181287471758 | 0.8134945983259060 | 0.5634856572417881 |
| 0.0244174362417533 | 0.8134975910690269 | 0.8134975910690269 |
| 0.3612948051572211 | 0.0608362225527044 | 0.0608362225527044 |
| 0.3612978423776642 | 0.0608255492534866 | 0.3108255100949787 |
| 0.3612928780545527 | 0.0608390027782309 | 0.5608365028345620 |
| 0.3612900805314820 | 0.0608500903898931 | 0.8108468855795152 |
| 0.3612978423776642 | 0.3108255100949787 | 0.0608255492534866 |
| 0.3612915211707138 | 0.3108420230707991 | 0.3108420230707991 |
| 0.3612881204195373 | 0.3108457307377818 | 0.5608457454977053 |
| 0.3612944142621252 | 0.3108295099306270 | 0.8108425254597315 |
| 0.3612928780545527 | 0.5608365028345620 | 0.0608390027782309 |
| 0.3612881204195373 | 0.5608457454977053 | 0.3108457307377818 |
| 0.3612932854420208 | 0.5608363084732948 | 0.5608363084732948 |
| 0.3612979635360354 | 0.5608274985866557 | 0.8108306425726028 |
| 0.3612900805314820 | 0.8108468855795155 | 0.0608500903898931 |
| 0.3612944142621252 | 0.8108425254597315 | 0.3108295099306270 |
| 0.3612979635360354 | 0.8108306425726028 | 0.5608274985866557 |
| 0.3612935274233762 | 0.8108339789619023 | 0.8108339789619023 |
| 0.1392165021162172 | 0.0607343053556319 | 0.0607343053556319 |
| 0.2465105990718466 | 0.0635969972984629 | 0.0635969972984629 |

|                    |                    |                    |
|--------------------|--------------------|--------------------|
| 0.1392195891636346 | 0.0607286995184641 | 0.3107321962924546 |
| 0.2465087345355357 | 0.0636018398722625 | 0.3136012508429010 |
| 0.1392150551507211 | 0.0607343371463511 | 0.5607321930455815 |
| 0.2465041561448819 | 0.0636060920617828 | 0.5636064001577816 |
| 0.1392125740441040 | 0.0607367418068860 | 0.8107331235968035 |
| 0.2465081854278329 | 0.0636037642681283 | 0.8136046807960778 |
| 0.1392195891636346 | 0.3107321962924546 | 0.0607286995184641 |
| 0.2465087345355357 | 0.3136012508429010 | 0.0636018398722625 |
| 0.1392184555209844 | 0.3107312897510355 | 0.3107312897510355 |
| 0.2465054219613448 | 0.3136051414336632 | 0.3136051414336632 |
| 0.1392125332056013 | 0.3107389719356190 | 0.5607338448374704 |
| 0.2465083781284045 | 0.3136025467531233 | 0.5636018185770770 |
| 0.1392151251888658 | 0.3107372722995563 | 0.8107342859130814 |
| 0.2465110987549365 | 0.3136016210998138 | 0.8135931502863883 |
| 0.1392150551507211 | 0.5607321930455815 | 0.0607343371463511 |
| 0.2465041561448819 | 0.5636064001577816 | 0.0636060920617828 |
| 0.1392125332056013 | 0.5607338448374704 | 0.3107389719356190 |
| 0.2465083781284045 | 0.5636018185770770 | 0.3136025467531233 |
| 0.1392160580078421 | 0.5607356407670927 | 0.5607356407670927 |
| 0.2465106347072675 | 0.5635991801281178 | 0.5635991801281178 |
| 0.1392144061518293 | 0.5607345262993132 | 0.8107303225482663 |
| 0.2465049714689720 | 0.5636070986251139 | 0.8136045754038514 |
| 0.1392125740441040 | 0.8107331235968035 | 0.0607367418068860 |
| 0.2465081854278329 | 0.8136046807960778 | 0.0636037642681283 |
| 0.1392151251888658 | 0.8107342859130814 | 0.3107372722995563 |
| 0.2465110987549365 | 0.8135931502863883 | 0.3136016210998138 |
| 0.1392144061518293 | 0.8107303225482663 | 0.5607345262993132 |
| 0.2465049714689720 | 0.8136045754038514 | 0.5636070986251139 |
| 0.1392138519029877 | 0.8107340849376981 | 0.8107340849376981 |
| 0.2465017263446264 | 0.8136086067910507 | 0.8136086067910507 |
| 0.4762728986979517 | 0.0579326636028505 | 0.0579326636028505 |
| 0.5843635438319196 | 0.0601876155615360 | 0.0601876155615360 |
| 0.4762752458602545 | 0.0579257267490169 | 0.3079252901969077 |
| 0.5843655247631524 | 0.0601874543248038 | 0.3101870416637927 |
| 0.4762794828548252 | 0.0579225735580620 | 0.5579237000642381 |
| 0.5843639062026095 | 0.0601890321071791 | 0.5601886555921056 |
| 0.4762769124596787 | 0.0579260301087367 | 0.8079273545532861 |
| 0.5843607463293129 | 0.0601904034649982 | 0.8101924220652593 |
| 0.4762752458602545 | 0.3079252901969077 | 0.0579257267490169 |
| 0.5843655247631524 | 0.3101870416637927 | 0.0601874543248038 |
| 0.4762816563109377 | 0.3079214047255441 | 0.3079214047255441 |
| 0.5843638495313171 | 0.3101888011556119 | 0.3101888011556119 |
| 0.4762773225408841 | 0.3079254304423547 | 0.5579240733142171 |
| 0.5843623632560877 | 0.3101905668615013 | 0.5601899076419573 |
| 0.4762719510268607 | 0.3079360389723391 | 0.8079285467186786 |
| 0.5843623276845834 | 0.3101884451524970 | 0.8101882578897901 |
| 0.4762794828548252 | 0.5579237000642381 | 0.0579225735580620 |
| 0.5843639062026095 | 0.5601886555921056 | 0.0601890321071791 |
| 0.4762773225408841 | 0.5579240733142171 | 0.3079254304423549 |
| 0.5843623632560877 | 0.5601899076419573 | 0.3101905668615013 |
| 0.4762729231626281 | 0.5579307301913845 | 0.5579307301913845 |

|                    |                    |                    |
|--------------------|--------------------|--------------------|
| 0.5843608905707229 | 0.5601893329353690 | 0.5601893329353690 |
| 0.4762750153171682 | 0.5579275326141551 | 0.8079273708241389 |
| 0.5843662985543292 | 0.5601875915938128 | 0.8101859542667024 |
| 0.4762769124596858 | 0.8079273545532861 | 0.0579260301087367 |
| 0.5843607463293129 | 0.8101924220652593 | 0.0601904034649982 |
| 0.4762719510268607 | 0.8079285467186786 | 0.3079360389723391 |
| 0.5843623276845834 | 0.8101882578897901 | 0.3101884451524970 |
| 0.4762750153171682 | 0.8079273708241389 | 0.5579275326141551 |
| 0.5843662985543292 | 0.8101859542667024 | 0.5601875915938128 |
| 0.4762791508126659 | 0.8079243335403233 | 0.8079243335403233 |
| 0.5843630642477240 | 0.8101898384845427 | 0.8101898384845427 |
| 0.6928553725605372 | 0.0621686618910941 | 0.0621686618910941 |
| 0.6928555548205608 | 0.0621679842474879 | 0.3121692330504087 |
| 0.6928551499160486 | 0.0621689186304390 | 0.5621685627971983 |
| 0.6928549827785300 | 0.0621698630793380 | 0.8121674776447814 |
| 0.6928555548205608 | 0.3121692330504087 | 0.0621679842474879 |
| 0.6928553852635757 | 0.3121687615156523 | 0.3121687615156523 |
| 0.6928549999332926 | 0.3121684703451965 | 0.5621692623344360 |
| 0.6928553072584630 | 0.3121682572568577 | 0.8121683182271413 |
| 0.6928551499160486 | 0.5621685627971983 | 0.0621689186304390 |
| 0.6928549999332926 | 0.5621692623344360 | 0.3121684703451965 |
| 0.6928552690560348 | 0.5621681147355259 | 0.5621681147355259 |
| 0.6928552920911057 | 0.5621678183292863 | 0.8121697192984699 |
| 0.6928549827785300 | 0.8121674776447814 | 0.0621698630793380 |
| 0.6928553072584630 | 0.8121683182271413 | 0.3121682572568577 |
| 0.6928552920911057 | 0.8121697192984699 | 0.5621678183292863 |
| 0.6928547378355050 | 0.8121690664993346 | 0.8121690664993346 |
| 0.8013412621194548 | 0.0641520034620030 | 0.0641520034620030 |
| 0.9094291039646567 | 0.0664098904884814 | 0.0664098904884814 |
| 0.8013407458150077 | 0.0641523091335170 | 0.3141508982356787 |
| 0.9094294781337021 | 0.0664091928950314 | 0.3164084996222108 |
| 0.8013392131091466 | 0.0641542259129041 | 0.5641513461637611 |
| 0.9094275840704794 | 0.0664110188670382 | 0.5664079042984219 |
| 0.8013380300230305 | 0.0641538465268638 | 0.8141537949918766 |
| 0.9094269428911554 | 0.0664112471950804 | 0.8164077420566009 |
| 0.8013407458150077 | 0.3141508982356787 | 0.0641523091335170 |
| 0.9094294781337021 | 0.3164084996222108 | 0.0664091928950314 |
| 0.8013420186608309 | 0.3141507215215324 | 0.3141507215215324 |
| 0.9094294193428383 | 0.3164091991791405 | 0.3164091991791405 |
| 0.8013400992824682 | 0.3141523752021720 | 0.5641513046976295 |
| 0.9094306129016603 | 0.3164109434796035 | 0.5664054807018113 |
| 0.8013398370334321 | 0.3141527659842415 | 0.8141528970985880 |
| 0.9094300980308517 | 0.3164072894831447 | 0.8164071556465513 |
| 0.8013392131091466 | 0.5641513461637611 | 0.0641542259129041 |
| 0.9094275840704794 | 0.5664079042984219 | 0.0664110188670382 |
| 0.8013400992824682 | 0.5641513046976295 | 0.3141523752021720 |
| 0.9094306129016603 | 0.5664054807018113 | 0.3164109434796035 |
| 0.8013402225071714 | 0.5641520389203221 | 0.5641520389203221 |
| 0.9094294882956584 | 0.5664071524835222 | 0.5664071524835222 |
| 0.8013401995688344 | 0.5641516724899315 | 0.8141519313488919 |
| 0.9094269233170651 | 0.5664118404550204 | 0.8164082926580370 |

|                    |                    |                    |
|--------------------|--------------------|--------------------|
| 0.8013380300230305 | 0.8141537949918766 | 0.0641538465268638 |
| 0.9094269428911554 | 0.8164077420566009 | 0.0664112471950804 |
| 0.8013398370334321 | 0.8141528970985880 | 0.3141527659842415 |
| 0.9094300980308517 | 0.8164071556465513 | 0.3164072894831447 |
| 0.8013401995688344 | 0.8141519313488919 | 0.5641516724899315 |
| 0.9094269233170651 | 0.8164082926580370 | 0.5664118404550204 |
| 0.8013385420350955 | 0.8141529288300774 | 0.8141529288300774 |
| 0.9094249610341210 | 0.8164109116381958 | 0.8164109116381958 |
| 0.3078750454710601 | 0.1842190296019459 | 0.1842190296019459 |
| 0.0778201505067617 | 0.1901046630046510 | 0.1901046630046510 |
| 0.3078871367196290 | 0.1842231463431581 | 0.4342350255116087 |
| 0.0778153230160799 | 0.1901039469005570 | 0.4401198440198679 |
| 0.3078750959802705 | 0.1842445759664912 | 0.6842329806809642 |
| 0.0778208707817332 | 0.1901161469969387 | 0.6901113662192847 |
| 0.3078715815120049 | 0.1842352943051208 | 0.9342322431784311 |
| 0.0778194385906896 | 0.1901069050671809 | 0.9401171288981965 |
| 0.3078871367196290 | 0.4342350255116087 | 0.1842231463431581 |
| 0.0778153230160799 | 0.4401198440198679 | 0.1901039469005570 |
| 0.3078719051276864 | 0.4342370158966942 | 0.4342370158966942 |
| 0.0778224653480387 | 0.4401151333637113 | 0.4401151333637113 |
| 0.3078758078218442 | 0.4342233807483217 | 0.6842250964314724 |
| 0.0778224443462919 | 0.4401024529638412 | 0.6901112407050375 |
| 0.3078785577112245 | 0.4342071297085170 | 0.9342333649622948 |
| 0.0778208623870553 | 0.4401079627983922 | 0.9401081746355886 |
| 0.3078750959802705 | 0.6842329806809642 | 0.1842445759664912 |
| 0.0778208707817332 | 0.6901113662192847 | 0.1901161469969387 |
| 0.3078758078218442 | 0.6842250964314724 | 0.4342233807483217 |
| 0.0778224443462919 | 0.6901112407050375 | 0.4401024529638412 |
| 0.3078789791063094 | 0.6842215033008842 | 0.6842215033008842 |
| 0.0778172166721811 | 0.6901093002709252 | 0.6901093002709252 |
| 0.3078857462541649 | 0.6842228958277609 | 0.9342172839567678 |
| 0.0778221800860527 | 0.6901177734963944 | 0.9401073165380434 |
| 0.3078715815120049 | 0.9342322431784311 | 0.1842352943051208 |
| 0.0778194385906896 | 0.9401171288981965 | 0.1901069050671809 |
| 0.3078785577112245 | 0.9342333649622948 | 0.4342071297085170 |
| 0.0778208623870553 | 0.9401081746355886 | 0.4401079627983923 |
| 0.3078857462541649 | 0.9342172839567678 | 0.6842228958277609 |
| 0.0778221800860527 | 0.9401073165380434 | 0.6901177734963944 |
| 0.3078808720164565 | 0.9342370408183605 | 0.9342370408183605 |
| 0.0778211698844071 | 0.9401078260035038 | 0.9401078260035038 |
| 0.4147037774473939 | 0.1874351177594469 | 0.1874351177594469 |
| 0.4146986115698370 | 0.1874598782812263 | 0.4374488351603362 |
| 0.4147075003186083 | 0.1874399613003731 | 0.6874666766907489 |
| 0.4147139957631973 | 0.1874381973486863 | 0.9374386942940692 |
| 0.4146986115698370 | 0.4374488351603362 | 0.1874598782812263 |
| 0.4147063750722532 | 0.4374516169992045 | 0.4374516169992045 |
| 0.4147080130159905 | 0.4374455689763789 | 0.6874498126157017 |
| 0.4147083081571286 | 0.4374393755053413 | 0.9374318198206012 |
| 0.4147075003186083 | 0.6874666766907489 | 0.1874399613003731 |
| 0.4147080130159905 | 0.6874498126157017 | 0.4374455689763789 |
| 0.4147085106786211 | 0.6874399320324008 | 0.6874399320324008 |

|                    |                    |                    |
|--------------------|--------------------|--------------------|
| 0.4146961180225947 | 0.6874388270857206 | 0.9374544123602321 |
| 0.4147139957631973 | 0.9374386942940692 | 0.1874381973486864 |
| 0.4147083081571286 | 0.9374318198206012 | 0.4374393755053413 |
| 0.4146961180225947 | 0.9374544123602321 | 0.6874388270857206 |
| 0.4147097862119422 | 0.9374553520727233 | 0.9374553520727233 |
| 0.9709935441185409 | 0.1868900992926756 | 0.1868900992926756 |
| 0.9709975249174040 | 0.1868914590545464 | 0.4368771899571242 |
| 0.9709947529042372 | 0.1868873793915870 | 0.6868979693311817 |
| 0.9709959708125682 | 0.1868876132877719 | 0.9368892394699548 |
| 0.9709975249174040 | 0.4368771899571242 | 0.1868914590545464 |
| 0.9709964713183983 | 0.4368937929908269 | 0.4368937929908269 |
| 0.9709930916143431 | 0.4368855037108315 | 0.6868900871557126 |
| 0.9709986793364453 | 0.4368838369171366 | 0.9368847587659640 |
| 0.9709947529042372 | 0.6868979693311817 | 0.1868873793915870 |
| 0.9709930916143431 | 0.6868900871557126 | 0.4368855037108315 |
| 0.9709985194164744 | 0.6868821642802178 | 0.6868821642802178 |
| 0.9710021319343909 | 0.6868789926077440 | 0.9369017459604860 |
| 0.9709959708125753 | 0.9368892394699548 | 0.1868876132877719 |
| 0.9709986793364453 | 0.9368847587659640 | 0.4368838369171366 |
| 0.9710021319343909 | 0.9369017459604860 | 0.6868789926077440 |
| 0.9709944940427699 | 0.9368920712022009 | 0.9368920712022009 |
| 0.1928469424555545 | 0.1871756697747343 | 0.1871756697747343 |
| 0.1928433506607340 | 0.1871803268871240 | 0.4371751185418237 |
| 0.1928450849432337 | 0.1871775170975884 | 0.6871671504563198 |
| 0.1928471185675536 | 0.1871737492139962 | 0.9371718637514566 |
| 0.1928433506607340 | 0.4371751185418237 | 0.1871803268871240 |
| 0.1928436961579106 | 0.4371708165032870 | 0.4371708165032870 |
| 0.1928467554451446 | 0.4371733745502676 | 0.6871719593319521 |
| 0.1928467435726454 | 0.4371725496169012 | 0.9371750494577186 |
| 0.1928450849432337 | 0.6871671504563198 | 0.1871775170975884 |
| 0.1928467554451446 | 0.6871719593319521 | 0.4371733745502676 |
| 0.1928470446094077 | 0.6871729885723811 | 0.6871729885723811 |
| 0.1928441818480841 | 0.6871752764672572 | 0.9371778658612062 |
| 0.1928471185675536 | 0.9371718637514566 | 0.1871737492139962 |
| 0.1928467435726454 | 0.9371750494577186 | 0.4371725496169012 |
| 0.1928441818480841 | 0.9371778658612062 | 0.6871752764672572 |
| 0.1928456324838941 | 0.9371736012077968 | 0.9371736012077968 |
| 0.6385782800616479 | 0.1861822985343776 | 0.1861822985343776 |
| 0.6385779152351320 | 0.1861814686153287 | 0.4361818962611268 |
| 0.6385779975218777 | 0.1861822436345085 | 0.6861816771719454 |
| 0.6385790202417702 | 0.1861806346515607 | 0.9361809898719545 |
| 0.6385779152351320 | 0.4361818962611268 | 0.1861814686153287 |
| 0.6385772498034147 | 0.4361825597822793 | 0.4361825597822793 |
| 0.6385788000033994 | 0.4361811852281351 | 0.6861810612021580 |
| 0.6385790736511519 | 0.4361815843700384 | 0.9361810573993383 |
| 0.6385779975218777 | 0.6861816771719454 | 0.1861822436345085 |
| 0.6385788000033994 | 0.6861810612021580 | 0.4361811852281351 |
| 0.6385781750621879 | 0.6861820854967001 | 0.6861820854967001 |
| 0.6385774507500713 | 0.6861824955724768 | 0.9361819472640952 |
| 0.6385790202417702 | 0.9361809898719545 | 0.1861806346515607 |
| 0.6385790736511519 | 0.9361810573993383 | 0.4361815843700384 |

|                    |                    |                    |
|--------------------|--------------------|--------------------|
| 0.6385774507500713 | 0.9361819472640952 | 0.6861824955724768 |
| 0.6385770420264847 | 0.9361829749466730 | 0.9361829749466730 |
| 0.5302044452322919 | 0.1841143127532071 | 0.1841143127532071 |
| 0.5302052345826291 | 0.1841115290363224 | 0.4341117420699200 |
| 0.5302016198093769 | 0.1841174797009660 | 0.6841143477976318 |
| 0.5302015923715192 | 0.1841171915776708 | 0.9341174688665579 |
| 0.5302052345826291 | 0.4341117420699200 | 0.1841115290363224 |
| 0.5302024943005830 | 0.4341148248791024 | 0.4341148248791024 |
| 0.5302020061095588 | 0.4341151902662497 | 0.6841162360194061 |
| 0.5302037816797884 | 0.4341168803448218 | 0.9341150298996586 |
| 0.5302016198093769 | 0.6841143477976318 | 0.1841174797009660 |
| 0.5302020061095588 | 0.6841162360194061 | 0.4341151902662497 |
| 0.5302036362378680 | 0.6841179413713897 | 0.6841179413713897 |
| 0.5302040204537722 | 0.6841123594111544 | 0.9341131674786760 |
| 0.5302015923715192 | 0.9341174688665579 | 0.1841171915776708 |
| 0.5302037816797884 | 0.9341150298996586 | 0.4341168803448218 |
| 0.5302040204537722 | 0.9341131674786760 | 0.6841123594111544 |
| 0.5302013633208276 | 0.9341159748708533 | 0.9341159748708533 |
| 0.7471192026915112 | 0.1881537181602904 | 0.1881537181602904 |
| 0.7471194697709842 | 0.1881531808651697 | 0.4381542828167103 |
| 0.7471184465318137 | 0.1881534731461824 | 0.6881531301199065 |
| 0.7471184912673874 | 0.1881541399862203 | 0.9381534354460869 |
| 0.7471194697709842 | 0.4381542828167103 | 0.1881531808651697 |
| 0.7471199046676722 | 0.4381524425080694 | 0.4381524425080694 |
| 0.7471188251721451 | 0.4381546151259984 | 0.6881533928282106 |
| 0.7471187456585845 | 0.4381549994193116 | 0.9381531805182612 |
| 0.7471184465318137 | 0.6881531301199065 | 0.1881534731461824 |
| 0.7471188251721451 | 0.6881533928282106 | 0.4381546151259984 |
| 0.7471191628714573 | 0.6881536923287378 | 0.6881536923287378 |
| 0.7471191833723588 | 0.6881541581954720 | 0.9381525520142964 |
| 0.7471184912673874 | 0.9381534354460869 | 0.1881541399862203 |
| 0.7471187456585845 | 0.9381531805182541 | 0.4381549994193116 |
| 0.7471191833723588 | 0.9381525520142964 | 0.6881541581954720 |
| 0.7471188079281680 | 0.9381527447849262 | 0.9381527447849262 |
| 0.8554760538895153 | 0.1902206839664683 | 0.1902206839664683 |
| 0.8554767764741881 | 0.1902193724085429 | 0.4402213805411678 |
| 0.8554775358993405 | 0.1902196328308251 | 0.6902174523552258 |
| 0.8554767937123225 | 0.1902230096246756 | 0.9402152518939249 |
| 0.8554767764741881 | 0.4402213805411678 | 0.1902193724085429 |
| 0.8554786807601857 | 0.4402187990115534 | 0.4402187990115534 |
| 0.8554793812994671 | 0.4402203345861419 | 0.6902161583547489 |
| 0.8554771736876996 | 0.4402233906108191 | 0.9402151283906054 |
| 0.8554775358993405 | 0.6902174523552258 | 0.1902196328308251 |
| 0.8554793812994671 | 0.6902161583547489 | 0.4402203345861419 |
| 0.8554779823165651 | 0.6902180963081106 | 0.6902180963081106 |
| 0.8554749935242094 | 0.6902206875109763 | 0.9402184256435366 |
| 0.8554767937123225 | 0.9402152518939249 | 0.1902230096246756 |
| 0.8554771736876996 | 0.9402151283906054 | 0.4402233906108191 |
| 0.8554749935242094 | 0.9402184256435366 | 0.6902206875109763 |
| 0.8554752455525624 | 0.9402180256773608 | 0.9402180256773608 |
